# Supplementary material for: Influence of isoflurane on the diastolic pressure-flow relationship and critical occlusion pressure during arterial CABG surgery: a randomized controlled trial
Source: PeerJ. 2016 Jan 26;4:e1619. doi: 10.7717/peerj.1619 (PMC4783760; doi:10.7717/peerj.1619)
Supplement: Supplemental Information 1 — All variables are presented clearly. [file peerj-04-1619-s001.xlsx]

## Sheet: Wilcoxon TIVA
Paorta1	Paorta2	B1	B2	1/B1	1/B2	CVR aus CSP1	CVR aus CSP2	CVR aus LVEDP1	CVR aus LVEDP2	Flowdia1	Flowdia2	CSP1	CSP2	LVEDP1	LVEDP2	ZFP1	ZFP2	HF1	HF2	SVV%1	SVV%2	PPV%1	PPV%2	CI1	CI2	O2S_VEN1	O2S_VEN2	SVRI1	SVRI2
60.7448	62.653	2.70959	2.10156	0.36906	0.475837	1.33418	0.939391	0.813584	0.611985	33.6422	53.2611	15.86	12.62	33.374	30.058	48.3287	38.3256	93	88							82.9	74.9
44.68	43.422	0.73866	1.07	1.3538	0.934579	1.96034	1.85043	2.03463	1.92034	15.709	16.42	13.885	13.038	12.718	11.89	23.4131	28.1187	82	82							48.9	42.9
60.76	66.55	2.37351	1.33	0.421317	0.75188	1.2092	1.64657	0.99877	1.42664	38.211	29.8505	14.5553	17.399	22.596	23.964	44.6621	43.9023	103	106	9	18.3333	7.66667	9	3.63333	2.94333	42.1	39.3	1223.82	1842.51
54.025	57.967	1.6453	2.09772	0.607792	0.476708	2.77881	1.40932	1.69172	1.09743	14.3079	31.7714	14.266	13.191	29.82	23.1	45.3291	43.4758	108	103	11.3333	5.33333	12.3333	3	2.80333	3.15333	41.9	44	1550.82	1537.47
51.958	57.028	1.45898	1.42919	0.68541	0.699697	1.72616	2.38199	1.52767	2.15279	24.6061	19.871	9.484	9.6955	14.368	14.25	35.388	43.1244	84	85	16.6667	13.6667	14.3333	21.3333	2.98667	2.74667	52.3	46.5	1264.41	1423.19
61.86	62.889	0.47542	0.46108	2.1034	2.16882	3.91814	5.51452	4.04904	5.63584	12.888	9.4426	11.363	10.8176	9.676	9.672	35.2429	42.813	57	54	14	12.5	5.33333	10.3333	2.30333	2.13667	39	41.1	2454.12	2193.22
50.5	57.0041	1.17223	0.864419	0.853077	1.15685	3.33242	2.81674	2.96329	2.77191	9.75266	14.7537	18	15.4466	21.6	16.108	42.1556	39.9363	102	101	14.6667	17.6667	9.66667	15.6667	3.39667	2.69667	23.5	46.1	808.7	1355.42
62.7748	63.5734	1.39218	1.85421	0.718297	0.539313	1.73813	1.43056	1.72369	1.48137	28.2492	35.5194	13.674	12.7607	14.082	10.956	42.4835	44.4173	83	96	7.33333	8.33333	9	13.6667	2.43333	2.2	65.2	50.9	1869.29	2010.78
52.1829	47.7246	1.33007	1.24126	0.751839	0.805636	1.63444	1.82454	1.64137	1.79361	27.0341	22.275	7.99723	7.08299	7.81	7.772	31.8576	29.7791	83	70	10.3333	10.6667	7.66667	10.6667	2.60333	2.42667	52.8	54.2	1933.77	1589.22
64.393	70.8963	1.0524	0.689737	0.950208	1.44983	1.50214	2.51914	1.33398	2.43866	34.6265	21.0174	12.379	17.9506	18.202	19.642	31.4906	40.4247	79	83	6	10	12	7.33333	3.085	2.78333	48.2	48.9	1559	1964.71

## Sheet: MP I TIVA
PATCODE	1	2	3	4	5	6	7	8	9	10	MP I	Mittelwert	Median	Minimum	Maximum	Stabw.	Anzahl
No. Messreihe	1. (9)	2.(13)	3.(18)	4.(22)	5.(23)	6.(26)	9.(31)	10.(33)	11.(36)	12. (37)	No. Messreihe
Intervention	TIVA Kontrolle	TIVA Kontrolle	TIVA Kontrolle	TIVA Kontrolle	TIVA Kontrolle	TIVA Kontrolle	TIVA Kontrolle	TIVA Kontrolle	TIVA Kontrolle	TIVA Kontrolle	Intervention
DATUM	2004-10-06	2004-10-28	2004-11-16	2004-11-26	2004-12-06	2004-12-13	2004-02-23	2005-01-07	2005-02-01	2005-02-02	DATUM
ZEIT	12:04:46	13:59:28	16:06:05	12:36:59	18:25:05	13:19:33	15:22:26	12:39:34	19:33:04	18:00:43	ZEIT
ALTER	77	70	66	78	65	58	70	70	78	79	ALTER	71.1	70	58	79	6.91938	10
Geschlecht	m	m	m	f	m	m	m	m	f	m	Geschlecht
GEWICHT	81	63	77	81	92	78	82	90	60	77	GEWICHT	78.1	79.5	60	92	10.1374	10
GROESSE	170	163	172	165	173	175	162	182	153	165	GROESSE	168	167.5	153	182	8.12404	10
KOF	1.92552	1.6785	1.90057	1.88429	2.05854	1.93513	1.86911	2.11578	1.5703	1.84417	KOF	1.87819	1.89243	1.5703	2.11578	0.160177	10
KHK	3	2	3	3	3	3	3	2	2	3	KHK	2.7	3	2	3	0.483046	10
OP-Dauer	284	292	307	235	253	272	386	247	292	263	OP-Dauer	283.1	278	235	386	42.647	10
No. Of Grafts	4	4	4	4	4	4	4	4	3	5	No. Of Grafts	4	4	3	5	0.471405	10
PerfZeit	142	118	165	124	109	126	128	103	106	149	PerfZeit	127	125	103	165	19.9611	10
Ischämiezeit	92	80	92	86	74	75	65	61	65	90	Ischämiezeit	78	77.5	61	92	11.8134	10
RePerfZeit	48	35	65	36	32	49	61	40	34	59	RePerfZeit	45.9	44	32	65	12.3149	10
Blutkardioplegie	ja	ja	ja	ja	ja	ja	ja	ja	ja	ja	Blutkardioplegie
antegrad	ja	ja	ja	ja	ja	ja	ja	ja	ja	ja	antegrad
retrograd	ja	nein	ja	ja	nein	ja	ja	ja	nein	nein	retrograd
O2S_VEN1	82.9	48.9	42.1	41.9	52.3	39	23.5	65.2	52.8	48.2	O2S_VEN1	49.68	48.55	23.5	82.9	15.9209	10
PO2_VEN1	50.9	26.2	24.3	26.1	29.6	23.3	18.7	37	28.5	25.8	PO2_VEN1	29.04	26.15	18.7	50.9	9.01458	10
PCO2VEN1	57.2	48.4	55.2	56.5	63.4	56.1	63.7	54.1	45.2	37.6	PCO2VEN1	53.74	55.65	37.6	63.7	8.04076	10
PCO2VEN_kPa1	7.626	6.45282	7.35941	7.53273	8.45266	7.4794	8.49265	7.21276	6.02618	5.01293	PCO2VEN_kPa1	7.16475	7.41941	5.01293	8.49265	1.07201	10
PH_VEN_1	7.303	7.346	7.3	7.296	7.272	7.323	7.142	7.264	7.32	7.319	PH_VEN_1	7.2885	7.3015	7.142	7.346	0.0569137	10
H_VEN_1	4.97737e-08	4.50817e-08	5.01187e-08	5.05825e-08	5.34564e-08	4.75335e-08	7.21107e-08	5.44503e-08	4.7863e-08	4.79733e-08	H_VEN_1	5.18944e-08	4.99462e-08	4.50817e-08	7.21107e-08	7.63109e-09	10
BE_VEN1	1.2	0.5	0	0.5	1	2	-7.9	-2.9	-2.7	-6.3	BE_VEN1	-1.46	0.25	-7.9	2	3.38992	10
SBIC_V1	25.3	24.2	23.5	24.2	24.6	25.2	17	21.5	21.5	18.7	SBIC_V1	22.57	23.85	17	25.3	2.84724	10
O2S_A_1	99.6	99.5	96.2	99.2	97.7	94.1	96	99.2	99.5	99.5	O2S_A_1	98.05	99.2	94.1	99.6	1.9637	10
PO2_A_1	298	259	81	152	108	70.8	86.1	182	223	173	PO2_A_1	163.29	162.5	70.8	298	78.7299	10
PO2_A_kPa1	39.7302	34.5306	10.7991	20.265	14.3988	9.43924	11.4791	24.2647	29.731	23.0648	PO2_A_kPa1	21.7703	21.6649	9.43924	39.7302	10.4965	10
PCO2_A_1	48.4	38.9	46.7	43	54.5	47.8	45.6	48.8	37.9	40	PCO2_A_1	45.16	46.15	37.9	54.5	5.20367	10
PCO2_A_kPa_1	6.45282	5.18625	6.22617	5.73287	7.26609	6.37282	6.07951	6.50615	5.05293	5.33291	PCO2_A_kPa_1	6.02085	6.15284	5.05293	7.26609	0.693768	10
PH_ART_1	7.343	7.405	7.344	7.377	7.305	7.363	7.24	7.279	7.361	7.382	PH_ART_1	7.3399	7.3525	7.24	7.405	0.0508799	10
H_ART_1	4.53942e-08	3.9355e-08	4.52898e-08	4.19759e-08	4.9545e-08	4.33511e-08	5.7544e-08	5.26017e-08	4.35512e-08	4.14954e-08	H_ART_1	4.60103e-08	4.44205e-08	3.9355e-08	5.7544e-08	5.61682e-09	10
BE_A1	0.3	-0.2	-0.5	0.1	0	1.3	-7.6	-4	-3.6	-1.2	BE_A1	-1.54	-0.35	-7.6	1.3	2.71874	10
SBIC_A1	24.8	24.3	23.9	24.5	24.4	25.5	18.2	21.1	21.5	23.5	SBIC_A1	23.17	24.1	18.2	25.5	2.23758	10
NAT_1	146.5	132.5	144.5	145.5	142.5	139	144	137	138	145	NAT_1	141.45	143.25	132.5	146.5	4.5853	10
K_1	4.05	5	4.95	4.2	5.05	5.2	3.2	4.4	4.3	4	K_1	4.435	4.35	3.2	5.2	0.622294	10
HB_1	8.2	8.35	9.6	7.5	10	9.8	9.45	9.15	8	9	HB_1	8.905	9.075	7.5	10	0.846381	10
HT_1	25.45	25.9	29.8	23.3	31	30.3	29.25	28.35	24.9	27.8	HT_1	27.605	28.075	23.3	31	2.58859	10
CAO2_A_1	11.3616	11.5565	12.8394	10.3463	13.5836	12.8205	12.6127	12.6224	11.0713	12.4528	CAO2_A_1	12.1267	12.5328	10.3463	13.5836	0.994117	10
CAO2_V_1	9.45052	5.67639	5.61858	4.36888	7.27062	5.3133	3.08742	8.29361	5.87224	6.03062	CAO2_V_1	6.09822	5.77432	3.08742	9.45052	1.84293	10
NA_A1	307	109	528	123	354	239	440	598	45	617	NA_A1	336	330.5	45	617	207.482	10
NA_V1	301	166	546	124	535	160	385	730	58	661	NA_V1	366.6	343	58	730	240.585	10
ADR_A1	972	20	20	482	20	901	6162	20	38	40	ADR_A1	867.5	39	20	6162	1898.49	10
ADR_V1	493	20	20	474	406	204	16532	20	38	35	ADR_V1	1824.2	121	20	16532	5171.59	10
LAC_A_1	1.1	0.9	1	1.6	0.8	1	5.5	1.3	1.6	1.5	LAC_A_1	1.63	1.2	0.8	5.5	1.39048	10
LAC_V_1	0.9	0.6	0.8	1.8	0.8	1	5.8	1.3	1.6	0.8	LAC_V_1	1.54	0.95	0.6	5.8	1.54575	10
MLE_1	18.1818	33.3333	20	-12.5	0	0	-5.45455	0	0	46.6667	MLE_1	10.0227	0	-12.5	46.6667	18.8589	10
GLU_A_1	92	159	132	166	141	203	223	154	206	95	GLU_A_1	157.1	156.5	92	223	44.618	10
GLU_V_1	98	159	127	163	144	203	214	150	204	63	GLU_V_1	152.5	154.5	63	214	48.1277	10
Endothelin_A_1											Endothelin_A_1	#DIV/0!	#NUM!	0	0	#DIV/0!	0
Endothelin_V_1											Endothelin_V_1	#DIV/0!	#NUM!	0	0	#DIV/0!	0
Pmax1	19	18	18	16	18	20	32	22	18	26	Pmax1	20.7	18.5	16	32	4.85455	10
Pmean1	8	8	7	7	5	9	10	10	8	10	Pmean1	8.2	8	5	10	1.61933	10
PEEP1	5	5	5	5	8	5	5	7	5	5	PEEP1	5.5	5	5	8	1.08012	10
AMV1	7	7.4	6	5.3	6.5	6.2	6.2	5.9	4.6	6.8	AMV1	6.19	6.2	4.6	7.4	0.818467	10
AF1	10	14	12	11	12	12	12	10	11	14	AF1	11.8	12	10	14	1.39841	10
APsys1			86	85	81.3333	120.667	69.6667	89.3333	111.667	97.5	APsys1	92.6458	87.6667	69.6667	120.667	16.6482	8
APdia1			46.6667	49	40.3333	59	36.3333	54.6667	46.3333	51.5	APdia1	47.9792	47.8333	36.3333	59	7.34979	8
APmean1			61.6667	63.3333	56	79.6667	47.3333	66	70.6667	67.5	APmean1	64.0208	64.6667	47.3333	79.6667	9.66438	8
HR1			103.667	106.333	82	53.3333	98	95	80.6667	83.5	HR1	87.8125	89.25	53.3333	106.333	17.08	8
PCCO1			6.73667	5.22667	5.76	4.47667	6.33333	5.09333	4.08333	4.895	PCCO1	5.32563	5.16	4.08333	6.73667	0.903043	8
PCCI1			3.6	2.76667	2.80333	2.30667	3.38333	2.4	2.60667	2.65	PCCI1	2.81458	2.70833	2.30667	3.6	0.454022	8
SV1			64.6667	49	69	83.6667	64.6667	53.3333	50.3333	71	SV1	63.2083	64.6667	49	83.6667	11.8455	8
SVI1			34.3333	26	33.6667	43	34.6667	25.3333	32.3333	38.5	SVI1	33.4792	34	25.3333	43	5.87532	8
SVmin1			63.3333	47.6667	88.3333	102.667	58	51.3333	54.6667	64	SVmin1	66.25	60.6667	47.6667	102.667	19.2632	8
SVmax1			69.3333	53.3333	102.333	116	67.6667	55.3333	60	68	SVmax1	74	67.8333	53.3333	116	22.7917	8
SVV%1			9	11.3333	16.6667	14	14.6667	7.33333	10.3333	6	SVV%1	11.1667	10.8333	6	16.6667	3.72891	8
PPV%1			7.66667	12.3333	14.3333	5.33333	9.66667	9	7.66667	12	PPV%1	9.75	9.33333	5.33333	14.3333	2.96407	8
CVP1			7	9	9	9	13	9	8	16	CVP1	10	9	7	16	2.9761	8
SVR1			643.923	823.027	614.225	1268.19	432.665	883.5	1231.47	845	SVR1	842.751	834.013	432.665	1268.19	291.323	8
SVRI1			1223.82	1550.82	1264.41	2454.12	808.7	1869.29	1933.77	1559	SVRI1	1582.99	1554.91	808.7	2454.12	506.46	8
dPmx1			816.667	506.667	806.667	1063.33	723.333	596.667	966.667	725	dPmx1	775.625	765.833	506.667	1063.33	181.888	8
TBlood1			37.6667	37.3	36.0667	36.3667	35.9667	36.2667	36.5333	37.1	TBlood1	36.6583	36.45	35.9667	37.6667	0.621761	8
CO1			6.79	5.28	6.12	4.45667	6.34667	5.16	4.07	5.685	CO1	5.48854	5.4825	4.07	6.79	0.933194	8
GEDV1			1671.67	1187.33	1267.33	1266	1269.33	1297.33	846.667	1525.5	GEDV1	1291.4	1268.33	846.667	1671.67	241.947	8
ITBV1			2089	1484	1583.67	1582	1586.33	1621.33	1058	1906.5	ITBV1	1613.85	1585	1058	2089	302.367	8
EVLW1			515.333	460.333	528.333	783.333	581.667	590	365	647.5	EVLW1	558.938	555	365	783.333	125.272	8
CI1			3.63333	2.80333	2.98667	2.30333	3.39667	2.43333	2.60333	3.085	CI1	2.90562	2.895	2.30333	3.63333	0.46246	8
CFI1			4.03333	4.4	4.76667	3.46667	5	3.9	4.76667	3.65	CFI1	4.24792	4.21667	3.46667	5	0.568445	8
GEF1			14.6667	16.3333	21.6667	26	20	15.5	23.3333	15	GEF1	19.0625	18.1667	14.6667	26	4.3094	8
GEDI1			894.667	630	618	653.667	679	612.333	541	827	GEDI1	681.958	641.833	541	894.667	118.682	8
ITBI1			1118	787	772.333	817	848.667	765.333	676.333	1033.5	ITBI1	852.271	802	676.333	1118	148.264	8
ELWI1			7	5.66667	6	10	7	6.66667	6.33333	8	ELWI1	7.08333	6.83333	5.66667	10	1.37725	8
PVPI1			1.16667	1.53333	1.63333	2.5	1.76667	1.76667	1.7	1.65	PVPI1	1.71458	1.675	1.16667	2.5	0.371552	8
InjVol1			15	15	15	15	15	15	15	15	InjVol1	15	15	15	15	0	8
TI1			8.33333	12.3333	12.6667	16.6667	19	9.33333	4.33333	5.5	TI1	11.0208	10.8333	4.33333	19	5.1443	8
MTt1			22.6667	21.6667	20.3333	31.6667	20	25.3333	20.6667	26.5	MTt1	23.6042	22.1667	20	31.6667	4.02368	8
DST1			7.66667	8	8	14.6667	8	10.3333	8	10.5	DST1	9.39583	8	7.66667	14.6667	2.41019	8
dia PI Mean1	1.10103	0.341756	0.699958	1.00338	0.701024	0.395749	1.36656	0.375559	0.841603	0.571291	dia PI Mean1	0.739791	0.700491	0.341756	1.36656	0.340608	10
dia PI Median1	0.966539	0.346456	0.667614	1.08437	0.655264	0.397025	1.36726	0.371047	0.824974	0.575955	dia PI Median1	0.72565	0.661439	0.346456	1.36726	0.336071	10
PI1	1.3	2.1	3.1	2	2.6	2.3	3.8	2.7	2.5	2.4	PI1	2.48	2.45	1.3	3.8	0.666333	10
Autoregulationsindex1	2.95416	2.20272	4.10893	5.33728	2.87727	1.58967	3.82043	3.25633	2.4432	1.76186	Autoregulationsindex1	3.03518	2.91571	1.58967	5.33728	1.15007	10
Probe1	3	3	2	2	3	2	2	3	2	2	Probe1	2.4	2	2	3	0.516398	10
Flowdia1	33.6422	15.709	38.211	14.3079	24.6061	12.888	9.75266	28.2492	27.0341	34.6265	Flowdia1	23.9027	25.8201	9.75266	38.211	10.1353	10
A1	-130.951	-17.2943	-106.006	-74.5799	-51.6304	-16.7552	-49.416	-59.1448	-42.373	-33.1408	A1	-58.1291	-50.5232	-130.951	-16.7552	36.8736	10
B1	2.70959	0.73866	2.37351	1.6453	1.45898	0.47542	1.17223	1.39218	1.33007	1.0524	B1	1.43483	1.36113	0.47542	2.70959	0.681839	10
1/B1	0.36906	1.3538	0.421317	0.607792	0.68541	2.1034	0.853077	0.718297	0.751839	0.950208	1/B1	0.88142	0.735068	0.36906	2.1034	0.511297	10
R1	0.969459	0.914133	0.918755	0.937886	0.942237	0.880682	0.962973	0.947483	0.966279	0.977435	R1	0.941732	0.94486	0.880682	0.977435	0.0301148	10
R²1	0.93985	0.83564	0.84411	0.87963	0.88781	0.7756	0.927316	0.897724	0.933695	0.95538	R²1	0.887675	0.892767	0.7756	0.95538	0.0561026	10
CVR aus COP	0.369062	1.35381	0.421289	0.607772	0.67341	2.06526	0.855599	0.718297	0.751839	0.950208	CVR aus COP	0.876654	0.735068	0.369062	2.06526	0.501728	10
ZFP1	48.3287	23.4131	44.6621	45.3291	35.388	35.2429	42.1556	42.4835	31.8576	31.4906	ZFP1	38.0351	38.7718	23.4131	48.3287	7.8134	10
DDT1	327	774	343	257	550	1215					DDT1	577.667	446.5	257	1215	365.03	6
Kardioplegietyp1	Blut	Blut	Blut	Blut	Blut	Blut	Blut	Blut	Blut	Blut	Kardioplegietyp1
HF1	93	82	103	108	84	57	102	83	83	79	HF1	87.4	83.5	57	108	14.8563	10
CSP1	15.86	13.885	14.5553	14.266	9.484	11.363	18	13.674	7.99723	12.379	CSP1	13.1464	13.7795	7.99723	18	2.95673	10
CVR aus CSP1	1.33418	1.96034	1.2092	2.77881	1.72616	3.91814	3.33242	1.73813	1.63444	1.50214	CVR aus CSP1	2.1134	1.73215	1.2092	3.91814	0.914567	10
ZFP/CSP1	3.04721	1.68621	3.06844	3.17742	3.73134	3.10155	2.3	3.10688	3.98359	2.54388	ZFP/CSP1	2.97465	3.085	1.68621	3.98359	0.665004	10
Paorta1	60.7448	44.68	60.76	54.025	51.958	61.86	50.5	62.7748	52.1829	64.393	Paorta1	56.3879	57.3849	44.68	64.393	6.56207	10
LVEDP1	33.374	12.718	22.596	29.82	14.368	9.676	21.6	14.082	7.81	18.202	LVEDP1	18.4246	16.285	7.81	33.374	8.41929	10
CVR aus LVEDP1	0.813584	2.03463	0.99877	1.69172	1.52767	4.04904	2.96329	1.72369	1.64137	1.33398	CVR aus LVEDP1	1.87777	1.66655	0.813584	4.04904	0.963502	10
ZFP/LVEDP1	1.44809	1.84094	1.97655	1.52009	2.46297	3.6423	1.951	3.01687	4.07908	1.73006	ZFP/LVEDP1	2.3668	1.96378	1.44809	4.07908	0.916439	10
LVPdiast1	24.591	10.236	15	20.506	6.67	8.329	18.039	8.4244	4.577	13.5672	LVPdiast1	12.994	11.9016	4.577	24.591	6.51335	10
Datapairs1	237	571	494	434	745	1636	444	571	767	926	Datapairs1	682.5	571	237	1636	388.302	10
Data per beat1	47.4	114.2	98.8	86.8	149	327.2	88.8	114.2	153.4	185.2	Data per beat1	136.5	114.2	47.4	327.2	77.6603	10
Beats1	5	5	5	5	5	5	5	5	5	5	Beats1	5	5	5	5	0	10
Diastole1	0.237	0.2284	0.1976	0.1736	0.298	0.6544	0.1776	0.2284	0.3068	0.3704	Diastole1	0.28722	0.2327	0.1736	0.6544	0.143232	10

## Sheet: MP II TIVA
PATCODE	1	2	3	4	5	6	7	8	9	10	MP II	Mittelwert	Median	Minimum	Maximum	Stabw.	Anzahl
Intervention	No Isofulrane	No Isofulrane	No Isofulrane	No Isofulrane	No Isofulrane	No Isofulrane	No Isofulrane	No Isofulrane	No Isofulrane	No Isofulrane	Intervention
Alter	#REF!	#REF!	#REF!	#REF!	#REF!	#REF!	#REF!	#REF!	#REF!	#REF!	Alter	#REF!	#REF!	#REF!	#REF!	#REF!	0
GEWICHT	#REF!	#REF!	#REF!	#REF!	#REF!	#REF!	#REF!	#REF!	#REF!	#REF!	GEWICHT	#REF!	#REF!	#REF!	#REF!	#REF!	0
GROESSE	#REF!	#REF!	#REF!	#REF!	#REF!	#REF!	#REF!	#REF!	#REF!	#REF!	GROESSE	#REF!	#REF!	#REF!	#REF!	#REF!	0
KOF	#REF!	#REF!	#REF!	#REF!	#REF!	#REF!	#REF!	#REF!	#REF!	#REF!	KOF	#REF!	#REF!	#REF!	#REF!	#REF!	0
O2S_VEN2	74.9	42.9	39.3	44	46.5	41.1	46.1	50.9	54.2	48.9	O2S_VEN2	48.88	46.3	39.3	74.9	10.1909	10
PO2_VEN2	43.3	24.1	24	26.3	26.9	24.4	28.2	29.9	29.8	26.5	PO2_VEN2	28.34	26.7	24	43.3	5.67983	10
PCO2VEN2	57.1	51.2	61.1	57.4	62.4	57.5	62	58.7	48.3	55.3	PCO2VEN2	57.1	57.45	48.3	62.4	4.55095	10
PCO2VEN_kPa2	7.61272	6.82612	8.14601	7.65272	8.31933	7.66605	8.26601	7.82604	6.43948	7.37274	PCO2VEN_kPa2	7.61272	7.65939	6.43948	8.31933	0.606744	10
PH_VEN_2	7.299	7.323	7.269	7.3	7.275	7.313	7.168	7.24	7.299	7.298	PH_VEN_2	7.2784	7.2985	7.168	7.323	0.0455197	10
H_VEN_2	5.02343e-08	4.75335e-08	5.3827e-08	5.01187e-08	5.30884e-08	4.86407e-08	6.79204e-08	5.7544e-08	5.02343e-08	5.03501e-08	H_VEN_2	5.29491e-08	5.02922e-08	4.75335e-08	6.79204e-08	5.99481e-09	10
BE_VEN2	0.8	0	-0.2	1.1	0.9	1.9	-6.8	-2.9	-2.8	-0.1	BE_VEN2	-0.81	-0.05	-6.8	1.9	2.62993	10
SBIC_V2	24.8	23.7	23.2	24.7	24.4	25.2	18.1	21.3	21.5	23.6	SBIC_V2	23.05	23.65	18.1	25.2	2.18441	10
O2S_A_2	99.7	99.1	98.2	98.9	97.5	98.7	93.7	99.9	99.5	99.3	O2S_A_2	98.45	99	93.7	99.9	1.81674	10
PO2_A_2	364	141	109	131	165	124	75	202	229	167	PO2_A_2	170.7	153	75	364	81.2363	10
PO2_A_kPa2	48.5295	18.7985	14.5322	17.4653	22	16.532	9.9992	26.9312	30.5309	22.2649	PO2_A_kPa2	22.7584	20.3992	9.9992	48.5295	10.8306	10
PCO2_A_2	48.7	41.6	50.9	46.3	50.5	46.7	50	51.7	39.7	41.9	PCO2_A_2	46.8	47.7	39.7	51.7	4.34716	10
PCO2_A_kPa_2	6.49281	5.54622	6.78612	6.17284	6.73279	6.22617	6.66613	6.89278	5.29291	5.58622	PCO2_A_kPa_2	6.2395	6.35949	5.29291	6.89278	0.579575	10
PH_ART_2	7.342	7.376	7.303	7.36	7.334	7.368	7.222	7.264	7.347	7.362	PH_ART_2	7.3278	7.3445	7.222	7.376	0.0501482	10
H_ART_2	4.54988e-08	4.20727e-08	4.97737e-08	4.36516e-08	4.63447e-08	4.28549e-08	5.99791e-08	5.44503e-08	4.4978e-08	4.3451e-08	H_ART_2	4.73055e-08	4.52384e-08	4.20727e-08	5.99791e-08	5.80003e-09	10
BE_A2	0.4	-0.8	-1.7	0.5	0.4	1.1	-7.2	-4	-3.6	-1.6	BE_A2	-1.65	-1.2	-7.2	1.1	2.6129	10
SBIC_A2	24.8	23.8	23	24.9	24.8	25.5	18.5	21.1	21.4	23.1	SBIC_A2	23.09	23.45	18.5	25.5	2.19416	10
NAT_2	147	133	145.5	145.5	142.5	140	144	138	138	145	NAT_2	141.85	143.25	133	147	4.46623	10
K_2	3.9	4.8	4.5	4	4.95	5	3.2	4.3	4.2	3.7	K_2	4.255	4.25	3.2	5	0.578528	10
HB_2	8.4	7.8	10.9	7.85	9.95	9.6	9.7	8.95	8.1	9	HB_2	9.025	8.975	7.8	10.9	1.01605	10
HT_2	26.1	25.85	33.75	24.45	30.8	29.7	30.05	27.75	25.2	27.9	HT_2	28.155	27.825	24.45	33.75	2.91552	10
CAO2_A_2	11.6523	10.7488	14.8817	10.7955	13.4899	13.1744	12.6359	12.4343	11.2098	12.4276	CAO2_A_2	12.345	12.431	10.7488	14.8817	1.3017	10
CAO2_V_2	8.74667	4.65197	5.95509	4.80188	6.43202	5.48514	6.21654	6.33314	6.1033	6.11821	CAO2_V_2	6.08439	6.11076	4.65197	8.74667	1.12358	10
NA_A_2	245	97	605	297	387	120	862	498	48	542	NA_A_2	370.1	342	48	862	259.318	10
NA_V_2	266	138	883	595	523	87	795	510	62	594	NA_V_2	445.3	516.5	62	883	292.593	10
ADR_A_2	1030	20	45	397	32	595	5969	20	20	50	ADR_A_2	817.8	47.5	20	5969	1841.51	10
ADR_V_2	988	20	29	1073	20	467	4777	20	20	107	ADR_V_2	752.1	68	20	4777	1472.81	10
LAC_A_2	1	0.8	0.8	1.7	0.8	1	5.2	1.3	1.5	1.2	LAC_A_2	1.53	1.1	0.8	5.2	1.32585	10
LAC_V_2	1	0.5	0.6	1.5	0.9	1	5.3	1.3	1.4	1	LAC_V_2	1.45	1	0.5	5.3	1.38984	10
MLE_2	0	37.5	25	11.7647	-12.5	0	-1.92308	0	6.66667	16.6667	MLE_2	8.3175	3.33333	-12.5	37.5	14.7574	10
GLU_A_2	91	147	123	161	137	196	229	143	192	75	GLU_A_2	149.4	145	75	229	47.4932	10
GLU_V_2	92	147	120	161	136	193	225	144	190	73	GLU_V_2	148.1	145.5	73	225	46.6582	10
Endothelin_A_2											Endothelin_A_2	#DIV/0!	#NUM!	0	0	#DIV/0!	0
Endothelin_V_2											Endothelin_V_2	#DIV/0!	#NUM!	0	0	#DIV/0!	0
Pmax2	21	18	20	17	21	21	22	22	17	30	Pmax2	20.9	21	17	30	3.72529	10
Pmean2	7	8	8	8	10	10	9	10	7	11	Pmean2	8.8	8.5	7	11	1.39841	10
PEEP2	4	5	5	5	5	5	5	7	5	5	PEEP2	5.1	5	4	7	0.737865	10
AMV2	7	7.3	6.4	5.76	7.3	7	6.5	5.8	4.5	7.1	AMV2	6.466	6.75	4.5	7.3	0.892938	10
AF2	10	14	12	12	11	12	12	10	11	15	AF2	11.9	12	10	15	1.59513	10
APsys2			101	95.6667	82.6667	97.3333	84.6667	82.6667	88.3333	124	APsys2	94.5417	92	82.6667	124	13.8185	8
APdia2			58.6667	52.6667	43.6667	55.3333	46.3333	54.3333	37.3333	60.6667	APdia2	51.125	53.5	37.3333	60.6667	7.99194	8
APmean2			73.6667	69.6667	57.6667	67.6667	58.6667	64.3333	56	84.3333	APmean2	66.5	66	56	84.3333	9.52524	8
HR2			106	104	81	56.3333	101.667	96.3333	70.3333	82.6667	HR2	87.2917	89.5	56.3333	106	17.8267	8
PCCO2			5.43333	5.95667	5.44333	3.97667	4.90333	4.71	3.62333	5.08333	PCCO2	4.89125	4.99333	3.62333	5.95667	0.778986	8
PCCI2			2.9	3.15667	2.65	2.04667	2.61667	2.21667	2.31	2.75	PCCI2	2.58083	2.63333	2.04667	3.15667	0.37022	8
SV2			51	57	67	70.3333	48	48.6667	51	61	SV2	56.75	54	48	70.3333	8.58339	8
SVI2			27.3333	30.3333	32.6667	36.3333	26	23	32.3333	33.3333	SVI2	30.1667	31.3333	23	36.3333	4.40418	8
SVmin2			50.3333	53.3333	60	67.5	48.3333	45.6667	45.6667	57.3333	SVmin2	53.5208	51.8333	45.6667	67.5	7.67569	8
SVmax2			59.6667	56.6667	69.3333	76	57.6667	50	51	63	SVmax2	60.4167	58.6667	50	76	8.85106	8
SVV%2			18.3333	5.33333	13.6667	12.5	17.6667	8.33333	10.6667	10	SVV%2	12.0625	11.5833	5.33333	18.3333	4.4543	8
PPV%2			9	3	21.3333	10.3333	15.6667	13.6667	10.6667	7.33333	PPV%2	11.375	10.5	3	21.3333	5.56188	8
CVP2			7	9	9	9	13	9	8	16	CVP2	10	9	7	16	2.9761	8
SVR2			969.455	815.939	691.361	1133.37	725.166	950.371	1012.05	1065.36	SVR2	920.384	959.913	691.361	1133.37	160.162	8
SVRI2			#REF!	#REF!	#REF!	#REF!	#REF!	#REF!	#REF!	#REF!	SVRI2	#REF!	#REF!	#REF!	#REF!	#REF!	0
dPmx2			853.333	610	693.333	736.667	790	500	820	886.667	dPmx2	736.25	763.333	500	886.667	130.839	8
TBlood2			37.7	36.7667	35.7	36.2333	35.7	36.1667	36.1333	37	TBlood2	36.425	36.2	35.7	37.7	0.687935	8
CO2			5.5	5.94667	5.63	4.14	5.03667	4.65667	3.79333	5.13	CO2	4.97917	5.08333	3.79333	5.94667	0.743675	8
GEDV2			1651	1189.33	1381.33	1483	1110.33	1334.67	943.667	1503	GEDV2	1324.54	1358	943.667	1651	231.792	8
ITBV2			2063.33	1486.67	1726.33	1853.33	1387.67	1668	1179	1878.33	ITBV2	1655.33	1697.17	1179	2063.33	289.725	8
EVLW2			510.667	422.667	574	617.667	555	551	385	640.333	EVLW2	532.042	553	385	640.333	89.2403	8
CI2			2.94333	3.15333	2.74667	2.13667	2.69667	2.2	2.42667	2.78333	CI2	2.63583	2.72167	2.13667	3.15333	0.35516	8
CFI2			3.3	4.96667	4.03333	2.76667	4.5	3.43333	3.96667	3.36667	CFI2	3.79167	3.7	2.76667	4.96667	0.714421	8
GEF2			12	18.6667	19	18.6667	17	14	21.3333	16	GEF2	17.0833	17.8333	12	21.3333	3.00661	8
GEDI2			883.333	631	673.667	765.667	593.667	630	603.333	815	GEDI2	699.458	652.333	593.667	883.333	108.333	8
ITBI2			1104	789	842	957	742.333	787.333	753.667	1018.67	ITBI2	874.25	815.5	742.333	1104	135.38	8
ELWI2			6.33333	5	6	8	7	6	6.33333	8.66667	ELWI2	6.66667	6.33333	5	8.66667	1.18187	8
PVPI2			1.23333	1.36667	1.63333	1.63333	1.93333	1.6	1.56667	1.66667	PVPI2	1.57917	1.61667	1.23333	1.93333	0.2085	8
InjVol2			15	15	15	15	15	15	15	15	InjVol2	15	15	15	15	0	8
TI22			5.33333	13	13.3333	5	9.33333	16	4	10	TI22	9.5	9.66667	4	16	4.42934	8
MTt2			27.6667	19	24.3333	35.3333	22.6667	28	24.3333	29	MTt2	26.2917	26	19	35.3333	4.89716	8
DST2			9.66667	7	9.33333	13.6667	9.66667	11	9.66667	11.3333	DST2	10.1667	9.66667	7	13.6667	1.91899	8
dia PI Mean2	0.640985	0.418634	0.389331	0.557944	0.799795	0.417355	0.728391	0.324569	0.879314	0.581777	dia PI Mean2	0.57381	0.569861	0.324569	0.879314	0.187923	10
dia PI Median2	0.607981	0.418341	0.386805	0.579726	0.692128	0.423893	0.772915	0.317693	0.879327	0.581364	dia PI Median2	0.566017	0.580545	0.317693	0.879327	0.181	10
PI2	1.2	2.5	2.9	2.8	2.6	2.6	2.6	2.5	2.7	2.7	PI2	2.51	2.6	1.2	2.9	0.477144	10
Autoregulationsindex2	1.98199	2.94376	3.10605	3.19588	3.45008	1.84322	2.43631	3.85963	2.44663	1.95444	Autoregulationsindex2	2.7218	2.69519	1.84322	3.85963	0.692181	10
Probe2	3	3	2	2	3	2	2	3	2	2	Probe2	2.4	2	2	3	0.516398	10
Flowdia2	53.2611	16.42	29.8505	31.7714	19.871	9.4426	14.7537	35.5194	22.275	21.0174	Flowdia2	25.4182	21.6462	9.4426	53.2611	12.6807	10
A2	-80.5436	-30.087	-58.39	-91.2	-61.633	-19.7402	-34.5217	-82.3592	-36.9635	-27.8824	A2	-52.3321	-47.6767	-91.2	-19.7402	25.9052	10
B2	2.10156	1.07	1.33	2.09772	1.42919	0.46108	0.864419	1.85421	1.24126	0.689737	B2	1.31392	1.28563	0.46108	2.10156	0.569985	10
1/B2	0.475837	0.934579	0.75188	0.476708	0.699697	2.16882	1.15685	0.539313	0.805636	1.44983	1/B2	0.945914	0.778758	0.475837	2.16882	0.528988	10
R2	0.959818	0.959583	0.940697	0.962933	0.917911	0.833343	0.959184	0.928352	0.966041	0.971376	R2	0.939924	0.959384	0.833343	0.971376	0.041275	10
R²2	0.92125	0.9208	0.88491	0.92724	0.84256	0.69446	0.920034	0.861837	0.933235	0.943572	R²2	0.88499	0.920417	0.69446	0.943572	0.0745414	10
CVR aus COP2	0.456757	0.931992	0.758705	0.456109	0.699692	2.12611	1.15685	0.539313	0.805636	1.44983	CVR aus COP2	0.938099	0.782171	0.456109	2.12611	0.521827	10
ZFP2	38.3256	28.1187	43.9023	43.4758	43.1244	42.813	39.9363	44.4173	29.7791	40.4247	ZFP2	39.4317	41.6188	28.1187	44.4173	5.86787	10
DDT2	488	668	451	366	489	1070					DDT2	588.667	488.5	366	1070	255.568	6
Kardioplegietyp2	Blut	Blut	Blut	Blut	Blut	Blut	Blut	Blut	Blut	Blut	Kardioplegietyp2
HF2	88	82	106	103	85	54	101	96	70	83	HF2	86.8	86.5	54	106	16.0472	10
CSP2	12.62	13.038	17.399	13.191	9.6955	10.8176	15.4466	12.7607	7.08299	17.9506	CSP2	13.0002	12.8993	7.08299	17.9506	3.34628	10
CVR aus CSP2	0.939391	1.85043	1.64657	1.40932	2.38199	5.51452	2.81674	1.43056	1.82454	2.51914	CVR aus CSP2	2.23332	1.83748	0.939391	5.51452	1.28522	10
ZFP/CSP2	3.0369	2.15667	2.52326	3.29587	4.44788	3.95773	2.58545	3.4808	4.20431	2.252	ZFP/CSP2	3.19409	3.16638	2.15667	4.44788	0.821731	10
Paorta2	62.653	43.422	66.55	57.967	57.028	62.889	57.0041	63.5734	47.7246	70.8963	Paorta2	58.9707	60.31	43.422	70.8963	8.34431	10
LVEDP2	30.058	11.89	23.964	23.1	14.25	9.672	16.108	10.956	7.772	19.642	LVEDP2	16.7412	15.179	7.772	30.058	7.24481	10
CVR aus LVEDP2	0.611985	1.92034	1.42664	1.09743	2.15279	5.63584	2.77191	1.48137	1.79361	2.43866	CVR aus LVEDP2	2.13306	1.85698	0.611985	5.63584	1.38411	10
ZFP/LVEDP2	1.27506	2.3649	1.83201	1.88207	3.02628	4.42648	2.47928	4.05416	3.83159	2.05808	ZFP/LVEDP2	2.72299	2.42209	1.27506	4.42648	1.06573	10
LVPdiast2	17.0123	10.109	15.94	12.789	6.3834	7.685	14.6368	8.69209	4.61397	16.1803	LVPdiast2	11.4042	11.449	4.61397	17.0123	4.4893	10
Datapairs2	253	602	446	401	763	1536	581	437	908	751	Datapairs2	667.8	591.5	253	1536	362.862	10
Data per beat2	50.6	120.4	89.2	80.2	152.6	307.2	116.2	87.4	181.6	150.2	Data per beat2	133.56	118.3	50.6	307.2	72.5725	10
Beats2	5	5	5	5	5	5	5	5	5	5	Beats2	5	5	5	5	0	10
Diastole2	0.253	0.2408	0.1784	0.1604	0.3052	0.6144	0.2324	0.1748	0.3632	0.3004	Diastole2	0.2823	0.2469	0.1604	0.6144	0.13332	10
Überprüfung											Überprüfung

## Sheet: Mann-Whitney-U
Gruppe	Paorta1	Paorta2	B1	B2	1/B1	1/B2	CVR aus CSP1	CVR aus CSP2	CVR aus LVEDP1	CVR aus LVEDP2	Flowdia1	Flowdia2	CSP1	CSP2	LVEDP1	LVEDP2	ZFP1	ZFP2	HR1	HR2	SVV%1	SVV%2	PPV%1	PPV%2	CI1	CI2	O2S_VEN1 [%]	O2S_VEN2 [%]
Iso	53.3375	48.4135	2.1127	2.69551	0.473327	0.370987	1.17722	1.25218	0.913013	0.916027	39.4227	34.3106	6.92815	5.45052	17.344	16.984	34.6776	35.6847	95.3333	88	13	15	18	18.3333	2.63667	2.05	46	51.2
Iso	70.587	51.0711	0.750615	2.50287	1.33224	0.399541	1.38735	1.34997	1.65941	1.72158	36.3641	23.7626	20.1372	18.9923	10.244	10.162	25.614	41.577	91.6667	80.6667	13.3333	10.3333	11.6667	7.33333	1.61333	2.04333	39.6	47
Iso	56.6615	51.1366	0.555108	1.24829	1.80145	0.801095	3.86252		3.84292	1.84571	12.6449	18.9795	7.82013		8.068	16.106	33.8823	35.9322	92.6667	99.6667	19	14.3333	12.5	14	2.46333	2.82333	62.6	73
Iso	64.8352	52.8164	4.81946	4.40573	0.207492	0.226977	0.883343	0.838393	0.89443	0.80673	58.7986	49.7643	12.8959	11.0943	12.244	12.67	52.635	41.521	114.333	95	11	14	10.3333	5	5.72333	5.79	64.8	72.1
Iso	61.3604	46.0359	2.54263	3.05593	0.393294	0.327232	0.782044	0.808331	0.785787	0.733544	67.6549	46.1266	8.45124	8.75032	8.198	12.2	34.7521	30.9418	89	89	5.5	10.6667	8.33333	16	3.91	3.72333	74.5	80.3
Iso	55.5562	49.5821	0.925695	1.30002	1.08027	0.769219	2.61229	1.91066	2.42839	1.82975	19.2826	22.0206	5.18424	7.50819	8.7304	9.29	34.7257	32.6434	101.667	88	18	16	14	19.3333	3.76	2.82667	29.7	33.1
Iso	79.4996	56.65	0.879481	1.67972	1.13703	0.595337	1.79621	1.04729	1.65394	0.919509	38.4716	42.3378	10.3966	12.31	15.87	17.72	35.7561	31.4417	87.3333	89.3333	7.33333	15	5.66667	9	2.10333	2.36333	44.8	56.7
Iso	63.5045	44.8007	0.962717	1.12043	1.03873	0.892518	2.40093	1.75544	2.38827	1.82281	22.3	19.861	9.9637	9.93605	10.246	8.598	40.3242	27.0744	77	74	12.3333	7.5	7.66667	8	1.95667	1.925	43.8	54.8
Iso	71.951	54.8664	0.495795	0.557273	2.01696	1.79445	8.82885	3.35271	5.38344	3.12832	6.5577	13.3575	14.054	10.0826	36.648	13.08	58.7244	30.8971	91.5	80	9.5	12.3333	9.5	9.33333	2.825	2.25667	72.6	71.6
Iso	58.4016	46.4174	2.10151	2.37591	0.475847	0.420892	2.25079	3.22482	1.6981	2.26915	19.7505	10.704	13.9473	11.8989	24.8632	22.1284	49.0033	41.9122	92.6667	88.6667	5	13	3.33333	6.33333	3.61667	3.07667	45.2	37.6
TIVA	60.7448	62.653	2.70959	2.10156	0.36906	0.475837	1.33418	0.939391	0.813584	0.611985	33.6422	53.2611	15.86	12.62	33.374	30.058	48.3287	38.3256	93	88							82.9	74.9
TIVA	44.68	43.422	0.73866	1.07	1.3538	0.934579	1.96034	1.85043	2.03463	1.92034	15.709	16.42	13.885	13.038	12.718	11.89	23.4131	28.1187	82	82							48.9	42.9
TIVA	60.76	66.55	2.37351	1.33	0.421317	0.75188	1.2092	1.64657	0.99877	1.42664	38.211	29.8505	14.5553	17.399	22.596	23.964	44.6621	43.9023	103	106	9	18.3333	7.66667	9	3.63333	2.94333	42.1	39.3
TIVA	54.025	57.967	1.6453	2.09772	0.607792	0.476708	2.77881	1.40932	1.69172	1.09743	14.3079	31.7714	14.266	13.191	29.82	23.1	45.3291	43.4758	108	103	11.3333	5.33333	12.3333	3	2.80333	3.15333	41.9	44
TIVA	51.958	57.028	1.45898	1.42919	0.68541	0.699697	1.72616	2.38199	1.52767	2.15279	24.6061	19.871	9.484	9.6955	14.368	14.25	35.388	43.1244	84	85	16.6667	13.6667	14.3333	21.3333	2.98667	2.74667	52.3	46.5
TIVA	61.86	62.889	0.47542	0.46108	2.1034	2.16882	3.91814	5.51452	4.04904	5.63584	12.888	9.4426	11.363	10.8176	9.676	9.672	35.2429	42.813	57	54	14	12.5	5.33333	10.3333	2.30333	2.13667	39	41.1
TIVA	50.5	57.0041	1.17223	0.864419	0.853077	1.15685	3.33242	2.81674	2.96329	2.77191	9.75266	14.7537	18	15.4466	21.6	16.108	42.1556	39.9363	102	101	14.6667	17.6667	9.66667	15.6667	3.39667	2.69667	23.5	46.1
TIVA	62.7748	63.5734	1.39218	1.85421	0.718297	0.539313	1.73813	1.43056	1.72369	1.48137	28.2492	35.5194	13.674	12.7607	14.082	10.956	42.4835	44.4173	83	96	7.33333	8.33333	9	13.6667	2.43333	2.2	65.2	50.9
TIVA	52.1829	47.7246	1.33007	1.24126	0.751839	0.805636	1.63444	1.82454	1.64137	1.79361	27.0341	22.275	7.99723	7.08299	7.81	7.772	31.8576	29.7791	83	70	10.3333	10.6667	7.66667	10.6667	2.60333	2.42667	52.8	54.2
TIVA	64.393	70.8963	1.0524	0.689737	0.950208	1.44983	1.50214	2.51914	1.33398	2.43866	34.6265	21.0174	12.379	17.9506	18.202	19.642	31.4906	40.4247	79	83	6	10	12	7.33333	3.085	2.78333	48.2	48.9

## Sheet: Wilcoxon Isofluran
Paorta1	Paorta2	B1	B2	1/B1	1/B2	CVR aus CSP1	CVR aus CSP2	CVR aus LVEDP1	CVR aus LVEDP2	Flowdia1	Flowdia2	CSP1	CSP2	LVEDP1	LVEDP2	ZFP1	ZFP2	HF1	HF2	SVV%1	SVV%2	PPV%1	PPV%2	CI1	CI2	O2S_VEN1 [%]	O2S_VEN2 [%]	SVRI1	SVRI2
53.3375	48.4135	2.1127	2.69551	0.473327	0.370987	1.17722	1.25218	0.913013	0.916027	39.4227	34.3106	6.92815	5.45052	17.344	16.984	34.6776	35.6847	93	88	13	15	18	18.3333	2.63667	2.05	46	51.2	1587.27	1964.56
70.587	51.0711	0.750615	2.50287	1.33224	0.399541	1.38735	1.34997	1.65941	1.72158	36.3641	23.7626	20.1372	18.9923	10.244	10.162	25.614	41.577	79	80.6667	13.3333	10.3333	11.6667	7.33333	1.61333	2.04333	39.6	47	2968.67	1915.59
56.6615	51.1366	0.555108	1.24829	1.80145	0.801095	3.86252		3.84292	1.84571	12.6449	18.9795	7.82013		8.068	16.106	33.8823	35.9322	94	99.6667	19	14.3333	12.5	14	2.46333	2.82333	62.6	73	1871.75	1274.2
64.8352	52.8164	4.81946	4.40573	0.207492	0.226977	0.883343	0.838393	0.89443	0.80673	58.7986	49.7643	12.8959	11.0943	12.244	12.67	52.635	41.521	112	95	11	14	10.3333	5	5.72333	5.79	64.8	72.1	850.14	698.673
61.3604	46.0359	2.54263	3.05593	0.393294	0.327232	0.782044	0.808331	0.785787	0.733544	67.6549	46.1266	8.45124	8.75032	8.198	12.2	34.7521	30.9418	90	89	5.5	10.6667	8.33333	16	3.91	3.72333	74.5	80.3	1218.83	1015.85
55.5562	49.5821	0.925695	1.30002	1.08027	0.769219	2.61229	1.91066	2.42839	1.82975	19.2826	22.0206	5.18424	7.50819	8.7304	9.29	34.7257	32.6434	87	88	18	16	14	19.3333	3.76	2.82667	29.7	33.1	1223.86	1263.75
79.4996	56.65	0.879481	1.67972	1.13703	0.595337	1.79621	1.04729	1.65394	0.919509	38.4716	42.3378	10.3966	12.31	15.87	17.72	35.7561	31.4417	90	89.3333	7.33333	15	5.66667	9	2.10333	2.36333	44.8	56.7	2620.23	1565.7
63.5045	44.8007	0.962717	1.12043	1.03873	0.892518	2.40093	1.75544	2.38827	1.82281	22.3	19.861	9.9637	9.93605	10.246	8.598	40.3242	27.0744	76	74	12.3333	7.5	7.66667	8	1.95667	1.925	43.8	54.8	2244.18	1453.78
71.951	54.8664	0.495795	0.557273	2.01696	1.79445	8.82885	3.35271	5.38344	3.12832	6.5577	13.3575	14.054	10.0826	36.648	13.08	58.7244	30.8971	90	80	9.5	12.3333	9.5	9.33333	2.825	2.25667	72.6	71.6	2106.39	1748.72
58.4016	46.4174	2.10151	2.37591	0.475847	0.420892	2.25079	3.22482	1.6981	2.26915	19.7505	10.704	13.9473	11.8989	24.8632	22.1284	49.0033	41.9122	95	88.6667	5	13	3.33333	6.33333	3.61667	3.07667	45.2	37.6	1487.83	1265.47

## Sheet: MP I Isofluran
PATCODE	1	2	3	4	5	6	7	8	9	10	MP I	Mittelwert	Median	Minimum	Maximum	Stabw.	Anzahl
No. Messreihe	6. (16)	7. (17)	8. (19)	9.(24)	10. (25)	11. (27)	12. (30)	13. (32)	14. (34)	15. (35)	No. Messreihe
Intervention	Isofluran	Isofluran	Isofluran	Isofluran	Isofluran	Isofluran	Isofluran	Isofluran	Isofluran	Isofluran	Intervention
ALTER [Jahre]	81	51	73	55	55	72	74	65	70	73	ALTER [a]	66.9	71	51	81	9.99389	10
Gschlecht	m	m	m	m	m	m	m	m	f	m	Geschlecht
GEWICHT [kg]	94	75	67	73	80	103	92	75	60	71	GEWICHT [kg]	79	75	60	103	13.3666	10
GROESSE [cm]	165	168	165	168	180	165	176	178	156	170	GROESSE [cm]	169.1	168	156	180	7.23341	10
KOF [m²]	2.00734	1.84764	1.7383	1.82653	1.99642	2.08688	2.08436	1.92673	1.59256	1.82065	KOF [m²]	1.89274	1.88719	1.59256	2.08688	0.158122	10
KHK	3	3	3	1	3	3	2	3	2	2	KHK	2.5	3	1	3	0.707107	10
OP-Dauer	271	309	311	227	266	276	333	286	266	217	OP-Dauer	276.2	273.5	217	333	36.1626	10
No. Of Grafts	4	5	4	2	4	5	4	4	4	2	No. Of Grafts	3.8	4	2	5	1.0328	10
PerfZeit	138	172	156	76	142	135	146	129	119	95	PerfZeit	130.8	136.5	76	172	28.256	10
Ischämiezeit	70	112	107	45	88	95	74	88	82	52	Ischämiezeit	81.3	85	45	112	21.7002	10
RePerfZeit	54	56	44	26	51	32	66	35	31	34	RePerfZeit	42.9	39.5	26	66	13.2619	10
Blutkardioplegie	ja	ja	ja	ja	ja	ja	ja	ja	ja	ja	Blutkardioplegie
antegrad	ja	ja	ja	ja	ja	ja	ja	ja	ja	ja	antegrad
retrograd	nein	nein	nein	nein	ja	ja	ja	ja	ja	nein	retrograd
O2S_VEN1 [%]	46	39.6	62.6	64.8	74.5	29.7	44.8	43.8	72.6	45.2	O2S_VEN1 [%]	52.36	45.6	29.7	74.5	15.1213	10
PO2_VEN1 [mmHg]	24.5	23.7	35	39.5	43.7	19.3	26.9	26.3	33.9	26.4	PO2_VEN1 [mmHg]	29.92	26.65	19.3	43.7	7.73718	10
PCO2VEN1 [mmHg]	45.8	57.5	50.2	65.9	60.7	50.6	54.1	53	37.8	55.9	PCO2VEN1 [mmHg]	53.15	53.55	37.8	65.9	7.83032	10
PCO2VEN_kPa1	6.10618	7.66605	6.6928	8.78596	8.09269	6.74613	7.21276	7.0661	5.0396	7.45274	PCO2VEN_kPa1	7.0861	7.13943	5.0396	8.78596	1.04396	10
PH_VEN_1	7.366	7.261	7.308	7.189	7.237	7.305	7.289	7.302	7.421	7.295	PH_VEN_1	7.2973	7.2985	7.189	7.421	0.0640955	10
H_VEN_1	4.30527e-08	5.48277e-08	4.9204e-08	6.47143e-08	5.79429e-08	4.9545e-08	5.14044e-08	4.98884e-08	3.79315e-08	5.06991e-08	H_VEN_1	5.0921e-08	5.02938e-08	3.79315e-08	6.47143e-08	7.39107e-09	10
BE_VEN1 [mmol/l]	0.7	-2	-1.5	-3.9	-2.6	-1.5	-1.2	-0.7	0.3	-0.2	BE_VEN1 [mmol/l]	-1.26	-1.35	-3.9	0.7	1.38018	10
SBIC_V1 [mmol/l]	24.3	21.8	22.6	20.8	21.9	22.2	22.6	23.1	24.3	23.4	SBIC_V1 [mmol/l]	22.7	22.6	20.8	24.3	1.11056	10
O2S_A_1 [%]	98.9	99.3	99.6	99.6	98.7	99.3	99.4	99.7	99.6	98.7	O2S_A_1 [%]	99.28	99.35	98.7	99.7	0.38239	10
PO2_A1 [mmHg]	140	216	261	254	138	168	208	293	191	124	PO2_A1 [mmHg]	199.3	199.5	124	293	57.6639	10
PO2_A_kPa1	18.6652	28.7977	34.7972	33.864	18.3985	22.3982	27.7311	39.0635	25.4646	16.532	PO2_A_kPa1	26.5712	26.5979	16.532	39.0635	7.6879	10
PCO2_A1 [mmHg]	39.3	44.6	40.5	55	53	37.5	44.8	41.7	34.7	44.7	PCO2_A1 [mmHg]	43.58	43.15	34.7	55	6.41263	10
PCO2_A_kPa_1	5.23958	5.94619	5.39957	7.33275	7.0661	4.9996	5.97286	5.55956	4.6263	5.95952	PCO2_A_kPa_1	5.8102	5.75287	4.6263	7.33275	0.854948	10
PH_ART_1	7.399	7.32	7.372	7.235	7.271	7.387	7.332	7.354	7.439	7.349	PH_ART_1	7.3458	7.3515	7.235	7.439	0.0602823	10
H_ART_1	3.99025e-08	4.7863e-08	4.2462e-08	5.82103e-08	5.35797e-08	4.10204e-08	4.65586e-08	4.42588e-08	3.63915e-08	4.47713e-08	H_ART_1	4.55018e-08	4.45151e-08	3.63915e-08	5.82103e-08	6.49104e-09	10
BE_A1 [mmol/l]	-0.3	-3.1	-1.6	-4.4	-3.1	-2.1	-2.2	-2.2	-0.2	-1.1	BE_A1 [mmol/l]	-2.03	-2.15	-4.4	-0.2	1.30644	10
SBIC_A1 [mmol/l]	24.2	21.8	23.1	20.7	21.9	22.7	22.6	22.6	24.2	23.5	SBIC_A1 [mmol/l]	22.73	22.65	20.7	24.2	1.09347	10
NAT_1 [mmol/l]	139	139	141	144	142	139	140	139	141	144	NAT_1 [mmol/l]	140.8	140.5	139	144	1.98886	10
K_1 [mmol/l]	5	5	4	3.7	4.2	3.6	4.3	4.5	4	4.5	K_1 [mmol/l]	4.28	4.25	3.6	5	0.482586	10
HB_1 [g/dl]	9.1	10.2	9.25	8.1	10.25	8.65	8.9	8.85	9.25	10.15	HB_1 [g/dl]	9.27	9.175	8.1	10.25	0.722342	10
HT_1 [%]	28.25	31.55	28.8	25.2	31.8	26.85	27.7	27.45	28.7	31.25	HT_1 [%]	28.755	28.475	25.2	31.8	2.17696	10
CAO2_A_1	12.5142	14.0854	12.8142	11.2218	14.0666	11.9445	12.3032	12.2737	12.812	13.9289	CAO2_A_1	12.7965	12.6631	11.2218	14.0854	0.96374	10
CAO2_V_1	5.8193	5.61522	8.04988	7.29706	10.6157	3.57158	5.54304	5.38887	9.3356	6.37786	CAO2_V_1	6.76141	6.09858	3.57158	10.6157	2.09022	10
NA_A1 (pg/ml)	330	989	616	887	314	152	465	480	71	128	NA_A1	443.2	397.5	71	989	312.469	10
NA_V1 (pg/ml)	332	552	600	718	344	156	411	598	135	89	NA_V1	393.5	377.5	89	718	220.447	10
ADR_A1 (pg/ml)	20	522	552	1463	1859	1407	20	20	20	1447	ADR_A1	733	537	20	1859	736.026	10
ADR_V1 (pg/ml)	20	206	553	1377	1026	755	20	20	20	997	ADR_V1	499.4	379.5	20	1377	513.017	10
LAC_A_1 [mmol/l]	2.1		1.4	2.2	1.8	2.2	2.2	1.3	2.7	1.5	LAC_A_1 [mmol/l]	1.93333	2.1	1.3	2.7	0.463681	9
LAC_V_1 [mmol/l]	2.1		1.3	2	1.7	2.3	1.8	0.8	2.7	1.5	LAC_V_1 [mmol/l]	1.8	1.8	0.8	2.7	0.563471	9
MLE [%]	0		7.14286	9.09091	5.55556	-4.54545	18.1818	38.4615	0	0	MLE [%]	8.20969	5.55556	-4.54545	38.4615	13.1742	9
GLU_A_1 [mg/dl]	199		111	128	143	220	113	115	147	170	GLU_A_1 [mg/dl]	149.556	143	111	220	39.3005	9
GLU_V_1 [mg/dl]	199		110	129	143	212	111	112	148	164	GLU_V_1 [mg/dl]	147.556	143	110	212	37.8256	9
Endothelin_A_1											Endothelin_A_1	#DIV/0!	#NUM!	0	0	#DIV/0!	0
Endothelin_V_1											Endothelin_V_1	#DIV/0!	#NUM!	0	0	#DIV/0!	0
Pmax [mmHg]1	32	9	24	14	18	25	20	16	20	18	Pmax [mmHg]	19.6	19	9	32	6.36309	10
Pmean [mmHg]1	11	2	10	7	9	10	8	7	8	7	Pmean [mmHg]	7.9	8	2	11	2.5144	10
PEEP [mmHg]1	5	2	6	5	6	5	5	5	5	5	PEEP [mmHg]	4.9	5	2	6	1.1005	10
AMV [l/min]1	6.6	6.48	6	7.4	5.9	7.4	7.1	6.5	4.7	6.1	AMV [l/min]	6.418	6.49	4.7	7.4	0.811936	10
AF [1/min]1	12	12	11	12	10	12	12	12	11	12	AF [1/min]	11.6	12	10	12	0.699206	10
Vol_A_Insp1	0	0	0	0	0	0	0	0	0	0	Vol_A_Insp	0	0	0	0	0	10
Vol_A_Exsp1	0	0	0	0	0	0	0	0	0	0	Vol_A_Exsp	0	0	0	0	0	10
APsys1	82.6667	94	105.333	100.667	95	92	111	95.3333	112.5	100	APsys	98.85	97.6667	82.6667	112.5	9.06848	10
APdia1	48	58	45.6667	50.3333	54	55.3333	63.6667	52.3333	63.5	56	APdia	54.6833	54.6667	45.6667	63.6667	5.98581	10
APmean1	59.3333	70	66.6667	69.6667	68.6667	69	80	67	84.5	74.3333	APmean	70.9167	69.3333	59.3333	84.5	7.12899	10
HR1	95.3333	91.6667	92.6667	114.333	89	101.667	87.3333	77	91.5	92.6667	HR	93.3167	92.1667	77	114.333	9.6783	10
PCCO1	5.21333	2.68	4.49	10.2	7.69	7.74333	4.10333	4.05667	4.83	6.37667	PCCO	5.73833	5.02167	2.68	10.2	2.25232	10
PCCI1	2.59	1.44667	2.57667	5.49	3.84333	3.67333	1.96	2.1	3.025	3.49667	PCCI	3.02017	2.8075	1.44667	5.49	1.16713	10
SV1	54.3333	29	48.3333	89	85.6667	85	47	52.6667	52.5	68.6667	SV	61.2167	53.5	29	89	19.9815	10
SVI1	27	15.6667	27.6667	48	43	40.6667	22.3333	27	33	37.6667	SVI	32.2	30.3333	15.6667	48	10.0765	10
SVmin1	49.3333	28.6667	44.3333	77.6667	56	84.3333	43	50.6667	50	64	SVmin	54.8	50.3333	28.6667	84.3333	16.6097	10
SVmax1	56.3333	32.6667	53.3333	87.3333	59.6667	99.6667	46.6667	57.3333	55	67.3333	SVmax	61.5333	56.8333	32.6667	99.6667	19.3386	10
SVV%1	13	13.3333	19	11	5.5	18	7.33333	12.3333	9.5	5	SVV%	11.4	11.6667	5	19	4.76756	10
PPV%1	18	11.6667	12.5	10.3333	8.33333	14	5.66667	7.66667	9.5	3.33333	PPV%	10.1	9.91667	3.33333	18	4.22602	10
CVP1	7	10	9	8	9	11	11	12	10	7	CVP	9.4	9.5	7	12	1.7127	10
SVR1	790.734	1606.74	1076.77	465.439	610.508	586.453	1257.09	1164.76	1322.64	817.196	SVR	969.833	946.985	465.439	1606.74	372.373	10
SVRI1	1587.27	2968.67	1871.75	850.14	1218.83	1223.86	2620.23	2244.18	2106.39	1487.83	SVRI	1817.92	1729.51	850.14	2968.67	670.515	10
dPmx1	510	706.667	1310	1350	686.667	563.333	843.333	1040	605	790	dPmx	840.5	748.333	510	1350	299.159	10
TBlood1	36.6667	36.4667	36.1333	35.9	36.6	36.5	36.2	36.3667	35.75	36.6	TBlood	36.3183	36.4167	35.75	36.6667	0.31333	10
CO1	5.29333	2.98667	4.28333	10.5967	7.81667	7.91	4.39	3.77667	4.505	6.59	CO	5.81483	4.89917	2.98667	10.5967	2.36596	10
GEDV1	1157.33	1083.67	794.333	1312.67	1329	1408.33	1740.67	1193	980	1404	GEDV	1240.3	1252.83	794.333	1740.67	262.213	10
ITBV1	1446.33	1354.33	992.667	1640.33	1660.67	1760	2175.67	1490.67	1224.5	1754.33	ITBV	1549.95	1565.5	992.667	2175.67	327.76	10
EVLW1	378.333	793	434.333	645.333	622.667	787.333	665.5	543.333	393.5	483	EVLW	574.633	583	378.333	793	152.349	10
CI1	2.63667	1.61333	2.46333	5.72333	3.91	3.76	2.10333	1.95667	2.825	3.61667	CI	3.06083	2.73083	1.61333	5.72333	1.22164	10
CFI1	4.5	2.66667	5.36667	8.06667	5.83333	5.6	2.5	3.13333	4.55	4.66667	CFI	4.68833	4.60833	2.5	8.06667	1.67877	10
GEF1	18	10.3333	23.6667	26.6667	25.3333	23.3333	10.3333	17	21	19.3333	GEF	19.5	20.1667	10.3333	26.6667	5.73757	10
GEDI1	576.333	586.333	457	706	664.667	669.333	834	618.333	615	770.667	GEDI	649.767	641.5	457	834	105.986	10
ITBI1	720.333	732.667	571	882.333	831	836.667	1042.67	773	768.5	963	ITBI	812.117	802	571	1042.67	132.546	10
ELWI1	4	10.6667	6.66667	8.66667	7.66667	7.66667	7.5	7.33333	7	6.66667	ELWI	7.38333	7.41667	4	10.6667	1.67415	10
PVPI1	1.26667	2.96667	2.13333	1.96667	1.83333	2.2	1.4	1.8	1.55	1.33333	PVPI	1.845	1.81667	1.26667	2.96667	0.512682	10
InjVol1	15	15	15	15	15	15	15	15	15	15	InjVol	15	15	15	15	0	10
TI1	6.33333	8.33333	17	14	16.6667	7.66667	6	8	7	11	TI	10.2	8.16667	6	17	4.22573	10
MTt1	20.3333	43.3333	20	12.6667	17	18.6667	35	31.6667	21	20.3333	MTt	24	20.3333	12.6667	43.3333	9.49464	10
DST1	7	21.3333	8.66667	5	6.66667	8	11.3333	13	8	7.33333	DST	9.63333	8	5	21.3333	4.7126	10
dia PI Mean1	0.536685	0.366604	0.318252	1.15434	0.254915	0.523657	0.41933	0.45	1.166	0.734225	dia PI Mean	0.5924	0.486829	0.254915	1.166	0.327108	10
dia PI Median1	0.524445	0.362563	0.314321	1.28947	0.253612	0.527488	0.435662	0.45	1.13047	0.749809	dia PI Median	0.603784	0.487223	0.253612	1.28947	0.349208	10
PI1	1.8	1.6	2.8	2.6	1.6	2.7	1.4	2.5	2.9	2.2	PI	2.21	2.35	1.4	2.9	0.564604	10
Autoregulationsindex1	3.12251	1.808	2.60415	3.89664	2.22848	2.51113	1.85889	2.69	5.0544	4.34795	Autoregulationsindex	3.01222	2.64708	1.808	5.0544	1.08858	10
Probe1	2	3	2	2	3	2	3	2	2	2	Probe	2.3	2	2	3	0.483046	10
Flowdia1	39.4227	36.3641	12.6449	58.7986	67.6549	19.2826	38.4716	22.3	6.5577	19.7505	Flowdia	32.1248	29.3321	6.5577	67.6549	19.8133	10
A1	-73.2635	-19.2263	-18.8083	-253.672	-88.3616	-32.1454	-31.4468	-38.8208	-29.1153	-102.981	A	-68.7841	-35.4831	-253.672	-18.8083	71.4281	10
B1	2.1127	0.750615	0.555108	4.81946	2.54263	0.925695	0.879481	0.962717	0.495795	2.10151	B	1.61457	0.944206	0.495795	4.81946	1.34074	10
1/B1	0.473327	1.33224	1.80145	0.207492	0.393294	1.08027	1.13703	1.03873	2.01696	0.475847	1/B	0.995664	1.0595	0.207492	2.01696	0.611167	10
R1	0.974477	0.849999	0.878588	0.989695	0.967124	0.9724	0.94574	0.881157	0.950946	0.977759	R	0.938788	0.959035	0.849999	0.989695	0.0498237	10
R²1	0.949605	0.722499	0.771916	0.979496	0.935329	0.945562	0.894424	0.776438	0.904299	0.956013	R²	0.883558	0.919814	0.722499	0.979496	0.0917531	10
CVR aus ZFP1	0.473327	1.23674	1.80145	0.207492	0.393294	1.08027	1.13703	1.03948	2.01696	0.475847	CVR aus ZFP	0.986189	1.05987	0.207492	2.01696	0.606056	10
ZFP1	34.6776	25.614	33.8823	52.635	34.7521	34.7257	35.7561	40.3242	58.7244	49.0033	ZFP	40.0095	35.2541	25.614	58.7244	10.2061	10
DDT1	594	919	448	240	761	728	714	886			DDT	661.25	721	240	919	227.278	8
Kardioplegietyp1	Blut	Blut	Blut	Blut	Blut	Blut	Blut	Blut	Blut	Blut	Kardioplegietyp
HF1	93	79	94	112	90	87	90	76	90	95	HF	90.6	90	76	112	9.75477	10
CSP1	6.92815	20.1372	7.82013	12.8959	8.45124	5.18424	10.3966	9.9637	14.054	13.9473	CSP	10.9778	10.1802	5.18424	20.1372	4.39115	10
CVR aus CSP1	1.17722	1.38735	3.86252	0.883343	0.782044	2.61229	1.79621	2.40093	8.82885	2.25079	CVR aus CSP	2.59816	2.0235	0.782044	8.82885	2.37924	10
ZFP/CSP1	5.00532	1.27198	4.3327	4.08152	4.11207	6.69832	3.4392	4.04711	4.17848	3.51347	ZFP/CSP	4.06802	4.0968	1.27198	6.69832	1.35	10
Paorta1	53.3375	70.587	56.6615	64.8352	61.3604	55.5562	79.4996	63.5045	71.951	58.4016	Paorta	63.5694	62.4324	53.3375	79.4996	8.32055	10
CVR aus LVEDP1	0.913013	1.65941	3.84292	0.89443	0.785787	2.42839	1.65394	2.38827	5.38344	1.6981	CVR aus LVEDP	2.16477	1.67876	0.785787	5.38344	1.45724	10
LVEDP1	17.344	10.244	8.068	12.244	8.198	8.7304	15.87	10.246	36.648	24.8632	LVEDP	15.2456	11.245	8.068	36.648	9.17733	10
ZFP/LVEDP1	1.9994	2.50039	4.19959	4.29884	4.23909	3.97756	2.25306	3.9356	1.60239	1.97092	ZFP/LVEDP	3.09768	3.218	1.60239	4.29884	1.11644	10
LVPdiast1	7.74679	10.3179	6.80487	10.0862	9.24152	6.47082	13.781	5.95813	35.7167	20.0505	LVPdiast	12.6174	9.66383	5.95813	35.7167	9.14639	10
Datapairs1	606	713	309	448	443	748	608	730	631	437	Datapairs	567.3	607	309	748	149.423	10
Data per beat1	121.2	142.6	61.8	89.6	88.6	149.6	121.6	146	126.2	87.4	Data per beat	113.46	121.4	61.8	149.6	29.8845	10
Beats1	5	5	5	5	5	5	5	5	5	5	Beats	5	5	5	5	0	10
Diastole1	0.2424	0.2852	0.1236	0.1792	0.1772	0.2992	0.2432	0.292	0.25	0.1748	Diastole	0.22668	0.2428	0.1236	0.2992	0.0596601	10

## Sheet: MP II Isofluran
PATCODE	1	2	3	4	5	6	7	8	9	10	MP II	Mittelwert	Median	Minimum	Maximum	Stabw.	Anzahl
No. Messreihe	6. (16)	7. (17)	8. (19)	9.(24)	10. (25)	11. (27)	12. (30)	13. (32)	14. (34)	15. (35)	No. Messreihe
Intervention	Isofluran	Isofluran	Isofluran	Isofluran	Isofluran	Isofluran	Isofluran	Isofluran	Isofluran	Isofluran	Intervention
ALTER [Jahre]	81	51	73	55	55	72	74	65	70	73	ALTER [a]	66.9	71	51	81	9.99389	10
GEWICHT [kg]	94	75	67	73	80	103	92	75	60	71	GEWICHT [kg]	79	75	60	103	13.3666	10
GROESSE [cm]	165	168	165	168	180	165	176	178	156	170	GROESSE [cm]	169.1	168	156	180	7.23341	10
KOF [m²]	2.00734	1.84764	1.7383	1.82653	1.99642	2.08688	2.08436	1.92673	1.59256	1.82065	KOF [m²]	1.89274	1.88719	1.59256	2.08688	0.158122	10
O2S_VEN2 [%]	51.2	47	73	72.1	80.3	33.1	56.7	54.8	71.6	37.6	O2S_VEN2 [%]	57.74	55.75	33.1	80.3	16.058	10
PO2_VEN2 [mmHg]	26.6	27.8	41.1	42.5	49.1	22	33.4	31.6	34.2	24.6	PO2_VEN2 [mmHg]	33.29	32.5	22	49.1	8.67531	10
PCO2VEN2 [mmHg]	46.5	59.3	47.6	58.6	58.2	49.4	58	52.1	39.9	64	PCO2VEN2 [mmHg]	53.36	55.05	39.9	64	7.45046	10
PCO2VEN_kPa2	6.1995	7.90603	6.34616	7.81271	7.75938	6.58614	7.73271	6.94611	5.31957	8.53265	PCO2VEN_kPa2	7.1141	7.33941	5.31957	8.53265	0.993315	10
PH_VEN_2	7.36	7.245	7.315	7.231	7.245	7.299	7.254	7.303	7.403	7.237	PH_VEN_2	7.2892	7.2765	7.231	7.403	0.0579018	10
H_VEN_2	4.36516e-08	5.68853e-08	4.84172e-08	5.87489e-08	5.68853e-08	5.02343e-08	5.57186e-08	4.97737e-08	3.95367e-08	5.79429e-08	H_VEN_2	5.17794e-08	5.29764e-08	3.95367e-08	5.87489e-08	6.56489e-09	10
BE_VEN2 [mmol/l]	0.2	-2.5	-2.1	-3.4	-3	-2.4	-2.2	-1	0.2	-1.7	BE_VEN2 [mmol/l]	-1.79	-2.15	-3.4	0.2	1.23599	10
SBIC_V2 [mmol/l]	23.5	21.5	22.3	21.3	21.6	21.5	21.9	23	24.2	21.9	SBIC_V2 [mmol/l]	22.27	21.9	21.3	24.2	0.978718	10
O2S_A_2 [%]	99.3	99.3	99.5	99.7	99.2	99.6	99.5	99.7	97.2	98.8	O2S_A_2 [%]	99.18	99.4	97.2	99.7	0.746548	10
PO2_A2 [mmHg]	163	236	235	273	184	190	260	277	165	141	PO2_A2 [mmHg]	212.4	212.5	141	277	49.7465	10
PO2_A_kPa2	21.7316	31.4641	31.3308	36.3971	24.5314	25.3313	34.6639	36.9304	21.9982	18.7985	PO2_A_kPa2	28.3177	28.3311	18.7985	36.9304	6.63233	10
PCO2_A2 [mmHg]	38.9	50.4	39.4	49.9	48	35.6	48	41.7	34	46.9	PCO2_A2 [mmHg]	43.28	44.3	34	50.4	6.09203	10
PCO2_A_kPa_2	5.18625	6.71946	5.25291	6.6528	6.39949	4.74629	6.39949	5.55956	4.53297	6.25283	PCO2_A_kPa_2	5.77021	5.90619	4.53297	6.71946	0.812206	10
PH_ART_2	7.41	7.285	7.371	7.276	7.297	7.395	7.289	7.353	7.447	7.323	PH_ART_2	7.3446	7.338	7.276	7.447	0.0597703	10
H_ART_2	3.89045e-08	5.188e-08	4.25598e-08	5.29663e-08	5.04661e-08	4.02717e-08	5.14044e-08	4.43609e-08	3.57273e-08	4.75335e-08	H_ART_2	4.56075e-08	4.59472e-08	3.57273e-08	5.29663e-08	6.11263e-09	10
BE_A2 [mmol/l]	0.1	-3.1	-2.2	-3.6	-3.3	-2.6	-3.6	-2.1	-0.2	-2	BE_A2 [mmol/l]	-2.26	-2.4	-3.6	0.1	1.30826	10
SBIC_A2 [mmol/l]	24.6	21.9	22.6	21.4	21.7	22.2	21.4	22.7	24.3	22.7	SBIC_A2 [mmol/l]	22.55	22.4	21.4	24.6	1.11679	10
NAT_2 [mmol/l]	139	139	142	144	143	138	142	139	141	145	NAT_2 [mmol/l]	141.2	141.5	138	145	2.39444	10
K_2 [mmol/l]	4.9	5.2	4.9	3.6	3.7	3.2	3.7	4.3	3.8	4	K_2 [mmol/l]	4.13	3.9	3.2	5.2	0.66675	10
HB_2 [g/dl]	11.55	8.65	9	7.6	10.45	8.4	9.4	8.5	9.5	11.3	HB_2 [g/dl]	9.435	9.2	7.6	11.55	1.29552	10
HT_2 [%]	?	31.35	27.95	23.7	32.3	26.15	29.1	26.35	29.5	34.8	HT_2 [%]	29.0222	29.1	23.7	34.8	3.43958	9
CAO2_A_2	15.9472	11.9467	12.4547	10.5408	14.415	11.6352	13.0087	11.7881	12.8404	15.5229	CAO2_A_2	13.01	12.6476	10.5408	15.9472	1.75953	10
CAO2_V_2	8.22073	5.65191	9.13357	7.61796	11.6655	3.86544	7.40946	6.4756	9.45584	5.90659	CAO2_V_2	7.54026	7.51371	3.86544	11.6655	2.22572	10
NA_A2 (pg/ml)	178	1001	192	1931	314	166	227	268	20	104	NA_2	440.1	209.5	20	1931	589.081	10
NA_V2 (pg/ml)	294	781	241	1296	259	187	398	315	20	117	NA_V2	390.8	276.5	20	1296	377.214	10
ADR_A2 (pg/ml)	20	233	1448	147	1947	1241	2128	20	20	1628	ADR_2	883.2	737	20	2128	874.518	10
ADR_V2 (pg/ml)	20	151	930	127	870	895	2140	20	20	912	ADR_V2	608.5	510.5	20	2140	680.815	10
LAC_A_2 [mmol/l]	2.1		1.6	2.1	2.2	1.7	3.1	1.2	2.6	1.9	LAC_A_2 [mmol/l]	2.05556	2.1	1.2	3.1	0.559265	9
LAC_V_2 [mmol/l]	2		1.4	2	2.2	1.8	2.7	0.8	2.5	2.4	LAC_V_2 [mmol/l]	1.97778	2	0.8	2.7	0.58902	9
MLE 2 [%]	4.7619		12.5	4.7619	0	-5.88235	12.9032	33.3333	3.84615	-26.3158	MLE 2 [%]	4.43426	4.7619	-26.3158	33.3333	15.985	9
GLU_A_2 [mg/dl]	190		95	107	152	137	111	105	132	166	GLU_A_2 [mg/dl]	132.778	132	95	190	31.8268	9
GLU_V_2 [mg/dl]	191		98	107	150	130	107	103	134	158	GLU_V_2 [mg/dl]	130.889	130	98	191	31.0743	9
Endothelin_A_2											Endothelin_A_2	#DIV/0!	#NUM!	0	0	#DIV/0!	0
Endothelin_V_2											Endothelin_V_2	#DIV/0!	#NUM!	0	0	#DIV/0!	0
Vol_ANAES_A_2 (ml/100ml)	1.67	2.43	2.37	2.31	2.61	2.15	1.54	2.59	2.9	2.03	Vol_ANAES_A_2	2.26	2.34	1.54	2.9	0.42374	10
Vol_ANAES_V_2 (ml/100ml)	1.46	2.31	0.85	1.38	1.43	1.64	0.81	1.53	1.23	1.47	Vol_ANAES_V_2	1.411	1.445	0.81	2.31	0.420409	10
Pmax [mmHg]2	32	11	25	16	20	24	20	15	20	18	Pmax [mmHg]	20.1	20	11	32	5.87745	10
Pmean [mmHg]2	9	2	10	8	10	10	8	7	8	7	Pmean [mmHg]	7.9	8	2	10	2.37814	10
PEEP [mmHg]2	5	2	6	5	6	6	5	5	5	5	PEEP [mmHg]	5	5	2	6	1.1547	10
AMV [l/min]2	6.6	4.08	7.5	8.6	6.9	7.7	7.1	6.2	5.3	6.1	AMV [l/min]	6.608	6.75	4.08	8.6	1.28278	10
AF [1/min]2	12	8	12	11	12	12	12	12	12	12	AF [1/min]	11.5	12	8	12	1.2693	10
Vol_A_Insp2	0.9	0.8	0.8	1.5	1	0.9	0.6	0.8	1	1.3	Vol_A_Insp	0.96	0.9	0.6	1.5	0.263312	10
Vol_A_Exsp2	0.6	0.6	0.5	0.7	0.7	0.9	0.6	0.6	0.7	0.7	Vol_A_Exsp	0.66	0.65	0.5	0.9	0.107497	10
APsys2	77	83.3333	85.3333	85.3333	74.3333	74.3333	89.6667	71	79.3333	75	APsys	79.4667	78.1667	71	89.6667	6.13068	10
APdia2	48.6667	47	36	41.3333	42	44.6667	44.6667	38.5	46	43	APdia	43.1833	43.8333	36	48.6667	3.87812	10
APmean2	57.3333	59	54	59.3333	54.3333	56	58.3333	48	59.3333	55.6667	APmean	56.1333	56.6667	48	59.3333	3.48258	10
HR2	88	80.6667	99.6667	95	89	88	89.3333	74	80	88.6667	HR	87.2333	88.3333	74	99.6667	7.42543	10
PCCO2	4.03333	3.94333	4.92	10.7	7.37	6.06667	4.66333	3.445	3.68667	5.60333	PCCO	5.44317	4.79167	3.445	10.7	2.21004	10
PCCI2	2.00333	2.12667	2.82333	5.77	3.68333	2.87667	2.23	1.78	2.30667	3.07	PCCI	2.867	2.565	1.78	5.77	1.17058	10
SV2	45.6667	49	49	112.333	82.3333	68.6667	52	46.5	46.6667	63	SV	61.5167	50.5	45.6667	112.333	21.5255	10
SVI2	22.3333	26.3333	28	60.3333	41	32.6667	24.6667	24	29.6667	34.6667	SVI	32.3667	28.8333	22.3333	60.3333	11.3273	10
SVmin2	43.3333	41	45	99	79	68.3333	45	42	45	58.3333	SVmin	56.6	45	41	99	19.6537	10
SVmax2	50.3333	45.6667	52	114	88.3333	79.6667	52.6667	45.5	50.6667	66.6667	SVmax	64.55	52.3333	45.5	114	22.7474	10
SVV%2	15	10.3333	14.3333	14	10.6667	16	15	7.5	12.3333	13	SVV%	12.8167	13.5	7.5	16	2.63927	10
PPV%2	18.3333	7.33333	14	5	16	19.3333	9	8	9.33333	6.33333	PPV%	11.2667	9.16667	5	19.3333	5.20161	10
CVP2	7	10	9	8	7	11	12	13	10	7	CVP	9.4	9.5	7	13	2.17051	10
SVR2	978.686	1036.78	733.014	382.513	508.833	605.569	751.164	754.528	1098.06	695.064	SVR	754.421	742.089	382.513	1098.06	229.222	10
SVRI2	1964.56	1915.59	1274.2	698.673	1015.85	1263.75	1565.7	1453.78	1748.72	1265.47	SVRI	1416.63	1363.99	698.673	1964.56	398.004	10
dPmx2	340	716.667	1090	1143.33	586.667	576.667	920	770	453.333	556.667	dPmx	715.333	651.667	340	1143.33	266.441	10
TBlood2	36.0667	36.2	35.6667	35.4	36.2	36.2	36.1	35.85	35.2667	36.2667	TBlood	35.9217	36.0833	35.2667	36.2667	0.361414	10
CO2	4.11333	3.78	4.91	10.7333	7.44	5.94333	4.93333	3.71	3.59333	5.6	CO	5.47567	4.92167	3.59333	10.7333	2.20459	10
GEDV2	1226.33	1130.67	833.333	1454	1382	1234.33	1505.33	1199	905.667	1460.67	GEDV	1233.13	1230.33	833.333	1505.33	229.878	10
ITBV2	1532.33	1413	1041.33	1817	1727	1542.33	1881	1498.5	1131.67	1825.33	ITBV	1540.95	1537.33	1041.33	1881	287.268	10
EVLW2	403.333	752	440	657	518.667	738	697.333	535.5	406	506.333	EVLW	565.417	527.083	403.333	752	135.143	10
CI2	2.05	2.04333	2.82333	5.79	3.72333	2.82667	2.36333	1.925	2.25667	3.07667	CI	2.88783	2.59333	1.925	5.79	1.16332	10
CFI2	3.3	3.3	5.83333	7.36667	5.46667	4.76667	3.2	3.05	3.93333	3.76667	CFI	4.39833	3.85	3.05	7.36667	1.43097	10
GEF2	14.6667	17.3333	23.3333	30.3333	24	21.6667	13.3333	15	20	17.5	GEF	19.7167	18.75	13.3333	30.3333	5.23995	10
GEDI2	610.667	611.667	479.333	782	691.667	586.667	721.667	622	568	802	GEDI	647.567	616.833	479.333	802	100.556	10
ITBI2	763.333	764.333	599	977.667	864.333	733	901.667	777	710.333	1001.67	ITBI	809.233	770.667	599	1001.67	125.58	10
ELWI2	4.33333	10	6.33333	9	6.33333	7	7.33333	7	7	7	ELWI	7.13333	7	4.33333	10	1.5251	10
PVPI2	1.3	2.86667	2.1	1.76667	1.5	2.33333	1.83333	1.75	1.73333	1.33333	PVPI	1.85167	1.75833	1.3	2.86667	0.477548	10
InjVol2	15	15	15	15	15	15	15	15	15	15	InjVol	15	15	15	15	0	10
TI2	10.3333	10	7.66667	17	14.3333	12.6667	4	8	8.33333	4.66667	TI	9.7	9.16667	4	17	4.0929	10
MTt2	28	35.3333	17.6667	13	17.6667	22.6667	31.3333	32.5	25.3333	25	MTt	24.85	25.1667	13	35.3333	7.219	10
DST2	10	17.3333	7.66667	5.33333	6.66667	10	12.6667	13	10	9	DST	10.1667	10	5.33333	17.3333	3.47922	10
dia PI Mean2	0.57155	0.861885	0.628208	1.09233	0.462114	0.6386	0.456289	0.614032	0.464385	1.16824	dia PI Mean	0.695763	0.62112	0.456289	1.16824	0.258954	10
dia PI Median2	0.579055	0.897776	0.649695	1.18481	0.458303	0.629753	0.466435	0.631723	0.461763	1.12828	dia PI Median	0.708759	0.630738	0.458303	1.18481	0.269421	10
PI2	2.5	3.6	2.8	2.6	1.8	2.1	1.3		2.3	4.5	PI	2.61111	2.5	1.3	4.5	0.957137	9
Autoregulationsindex2	3.4136	3.86654	2.38456	3.21943	3.16256	3.68031	2.11545	2.39118	3.01766	5.99346	Autoregulationsindex	3.32448	3.191	2.11545	5.99346	1.10048	10
Probe2	2	3	2	2	3	2	3	2	2	2	Probe	2.3	2	2	3	0.483046	10
Flowdia2	34.3106	23.7626	18.9795	49.7643	46.1266	22.0206	42.3378	19.861	13.3575	10.704	Flowdia	28.1224	22.8916	10.704	49.7643	13.9936	10
A2	-96.1885	-104.062	-44.8539	-182.93	-94.5562	-42.4371	-52.8133	-30.3349	-17.2181	-99.5794	A	-76.4973	-73.6847	-182.93	-17.2181	49.1051	10
B2	2.69551	2.50287	1.24829	4.40573	3.05593	1.30002	1.67972	1.12043	0.557273	2.37591	B	2.09417	2.02781	0.557273	4.40573	1.1404	10
1/B2	0.370987	0.399541	0.801095	0.226977	0.327232	0.769219	0.595337	0.892518	1.79445	0.420892	1/B	0.659825	0.508114	0.226977	1.79445	0.457511	10
R2	0.944672	0.941484	0.91021	0.990307	0.909338	0.901262	0.974891	0.941949	0.745504	0.981231	R	0.924085	0.941716	0.745504	0.990307	0.07	10
R²2	0.892406	0.886391	0.828483	0.980707	0.826896	0.812273	0.950413	0.887268	0.555776	0.962814	R²	0.858343	0.88683	0.555776	0.980707	0.121426	10
CVR aus ZFP2	0.370987	0.399541	0.801095	0.226977	0.327232	0.769219	0.595409	0.892518	1.79445	0.420892	CVR aus ZFP	0.659832	0.50815	0.226977	1.79445	0.45751	10
ZFP2	35.6847	41.577	35.9322	41.521	30.9418	32.6434	31.4417	27.0744	30.8971	41.9122	ZFP	34.9625	34.164	27.0744	41.9122	5.26217	10
DDT2	551	487	452	339	582	657	668	937			DDT	584.125	566.5	339	937	179.262	8
Kardioplegietyp2	Blut	Blut	Blut	Blut	Blut	Blut	Blut	Blut	Blut	Blut	Kardioplegietyp						0
HF2	89	81	99	115	90	88	90	75		91	HF	90.8889	90	75	115	11.241	9
CSP2	5.45052	18.9923		11.0943	8.75032	7.50819	12.31	9.93605	10.0826	11.8989	CSP	10.6693	10.0826	5.45052	18.9923	3.79885	9
CVR aus CSP2	1.25218	1.34997		0.838393	0.808331	1.91066	1.04729	1.75544	3.35271	3.22482	CVR aus CSP	1.72664	1.34997	0.808331	3.35271	0.960738	9
ZFP/CSP2	6.54702	2.18914	0.530934	3.74255	3.53608	4.34771	2.55416	2.72487	3.06439	3.52234	ZFP/CSP	3.27592	3.29336	0.530934	6.54702	1.55565	10
Paorta2	48.4135	51.0711	51.1366	52.8164	46.0359	49.5821	56.65	44.8007	54.8664	46.4174	Paorta	50.179	50.3266	44.8007	56.65	3.89057	10
LVEDP2	16.984	10.162	16.106	12.67	12.2	9.29	17.72	8.598	13.08	22.1284	LVEDP	13.8938	12.875	8.598	22.1284	4.28288	10
CVR aus LVEDP2	0.916027	1.72158	1.84571	0.80673	0.733544	1.82975	0.919509	1.82281	3.12832	2.26915	CVR aus LVEDP	1.59931	1.77219	0.733544	3.12832	0.765361	10
ZFP/LVEDP2	2.10108	4.09141	2.23098	3.27711	2.53621	3.51382	1.77436	3.14892	2.36216	1.89404	ZFP/LVEDP	2.69301	2.44919	1.77436	4.09141	0.771612	10
LVPdiast2	8.17036	9.26449	10.8958	10.5799	8.67972	7.24645	15.2	6.19002	10.0826	18.5577	LVPdiast	10.4867	9.67355	6.19002	18.5577	3.75323	10
Datapairs2	636	705	497	583	570	804	629	1053	521	571	Datapairs	656.9	606	497	1053	165.493	10
Data per beat2	127.2	141	99.4	116.6	114	160.8	125.8	210.6	104.2	114.2	Data per beat	131.38	121.2	99.4	210.6	33.0986	10
Beats2	5	5	5	5	5	5	5	5	5	5	Beats	5	5	5	5	0	10
Diastole2	0.2544	0.282	0.1988	0.2332	0.228	0.3216	0.2516	0.4212	0.521	0.2284	Diastole	0.29402	0.253	0.1988	0.521	0.101871	10
