# Supplementary material for: Influence of isoflurane on the diastolic pressure-flow relationship and critical occlusion pressure during arterial CABG surgery: a randomized controlled trial
Source: PeerJ. 2016 Jan 26;4:e1619. doi: 10.7717/peerj.1619 (PMC4783760; doi:10.7717/peerj.1619)
Supplement: Supplemental Information 2 — All variables are clearly presented. [file peerj-04-1619-s002.xls]

## Sheet: Mann-Whitney-U vs Isofluran (1)
Gruppe	ALTER	Gschlecht	GEWICHT	GROESSE	KOF	KHK	OP-Dauer	Grafts	PerfZeit	Ischämiezeit	RePerfZeit	O2S_VEN1	PO2_VEN1	PCO2VEN1	PCO2VEN_kPa1	PH_VEN_1	H_VEN_1	BE_VEN1	SBIC_V1	O2S_A_1	PO2_A1	PO2_A_kPa1	PCO2_A1	PCO2_A_kPa_1	PH_ART_1	H_ART_1	BE_A1	SBIC_A1	NAT_1	K_1	HB_1	HT_1	CAO2_A_1	CAO2_V_1	NA_A1	NA_V1	ADR_A1	ADR_V1	LAC_A_1	LAC_V_1	GLU_A_1	GLU_V_1	Pmax1	Pmean1	PEEP1	AMV1	AF1	Vol_A_Insp1	Vol_A_Exsp1
1	81	m	94	165	2.00734	3	271	4	138	70	54	46	24.5	45.8	6.10618	7.366	4.30527e-08	0.7	24.3	98.9	140	18.6652	39.3	5.23958	7.399	3.99025e-08	-0.3	24.2	139	5	9.1	28.25	12.5142	5.8193	330	332	20	20	2.1	2.1	199	199	32	11	5	6.6	12	0	0
1	51	m	75	168	1.84764	3	309	5	172	112	56	39.6	23.7	57.5	7.66605	7.261	5.48277e-08	-2	21.8	99.3	216	28.7977	44.6	5.94619	7.32	4.7863e-08	-3.1	21.8	139	5	10.2	31.55	14.0854	5.61522	989	552	522	206					9	2	2	6.48	12	0	0
1	73	m	67	165	1.7383	3	311	4	156	107	44	62.6	35	50.2	6.6928	7.308	4.9204e-08	-1.5	22.6	99.6	261	34.7972	40.5	5.39957	7.372	4.2462e-08	-1.6	23.1	141	4	9.25	28.8	12.8142	8.04988	616	600	552	553	1.4	1.3	111	110	24	10	6	6	11	0	0
1	55	m	73	168	1.82653	1	227	2	76	45	26	64.8	39.5	65.9	8.78596	7.189	6.47143e-08	-3.9	20.8	99.6	254	33.864	55	7.33275	7.235	5.82103e-08	-4.4	20.7	144	3.7	8.1	25.2	11.2218	7.29706	887	718	1463	1377	2.2	2	128	129	14	7	5	7.4	12	0	0
1	55	m	80	180	1.99642	3	266	4	142	88	51	74.5	43.7	60.7	8.09269	7.237	5.79429e-08	-2.6	21.9	98.7	138	18.3985	53	7.0661	7.271	5.35797e-08	-3.1	21.9	142	4.2	10.25	31.8	14.0666	10.6157	314	344	1859	1026	1.8	1.7	143	143	18	9	6	5.9	10	0	0
1	72	m	103	165	2.08688	3	276	5	135	95	32	29.7	19.3	50.6	6.74613	7.305	4.9545e-08	-1.5	22.2	99.3	168	22.3982	37.5	4.9996	7.387	4.10204e-08	-2.1	22.7	139	3.6	8.65	26.85	11.9445	3.57158	152	156	1407	755	2.2	2.3	220	212	25	10	5	7.4	12	0	0
1	74	m	92	176	2.08436	2	333	4	146	74	66	44.8	26.9	54.1	7.21276	7.289	5.14044e-08	-1.2	22.6	99.4	208	27.7311	44.8	5.97286	7.332	4.65586e-08	-2.2	22.6	140	4.3	8.9	27.7	12.3032	5.54304	465	411	20	20	2.2	1.8	113	111	20	8	5	7.1	12	0	0
1	65	m	75	178	1.92673	3	286	4	129	88	35	43.8	26.3	53	7.0661	7.302	4.98884e-08	-0.7	23.1	99.7	293	39.0635	41.7	5.55956	7.354	4.42588e-08	-2.2	22.6	139	4.5	8.85	27.45	12.2737	5.38887	480	598	20	20	1.3	0.8	115	112	16	7	5	6.5	12	0	0
1	70	f	60	156	1.59256	2	266	4	119	82	31	72.6	33.9	37.8	5.0396	7.421	3.79315e-08	0.3	24.3	99.6	191	25.4646	34.7	4.6263	7.439	3.63915e-08	-0.2	24.2	141	4	9.25	28.7	12.812	9.3356	71	135	20	20	2.7	2.7	147	148	20	8	5	4.7	11	0	0
1	73	m	71	170	1.82065	2	217	2	95	52	34	45.2	26.4	55.9	7.45274	7.295	5.06991e-08	-0.2	23.4	98.7	124	16.532	44.7	5.95952	7.349	4.47713e-08	-1.1	23.5	144	4.5	10.15	31.25	13.9289	6.37786	128	89	1447	997	1.5	1.5	170	164	18	7	5	6.1	12	0	0
2	77	m	81	170	1.92552	3	284	4	142	92	48	82.9	50.9	57.2	7.626	7.303	4.97737e-08	1.2	25.3	99.6	298	39.7302	48.4	6.45282	7.343	4.53942e-08	0.3	24.8	146.5	4.05	8.2	25.45	11.3616	9.45052	307	301	972	493	1.1	0.9	92	98	19	8	5	7	10	0	0
2	70	m	63	163	1.6785	2	292	4	118	80	35	48.9	26.2	48.4	6.45282	7.346	4.50817e-08	0.5	24.2	99.5	259	34.5306	38.9	5.18625	7.405	3.9355e-08	-0.2	24.3	132.5	5	8.35	25.9	11.5565	5.67639	109	166	20	20	0.9	0.6	159	159	18	8	5	7.4	14	0	0
2	66	m	77	172	1.90057	3	307	4	165	92	65	42.1	24.3	55.2	7.35941	7.3	5.01187e-08	0	23.5	96.2	81	10.7991	46.7	6.22617	7.344	4.52898e-08	-0.5	23.9	144.5	4.95	9.6	29.8	12.8394	5.61858	528	546	20	20	1	0.8	132	127	18	7	5	6	12	0	0
2	78	f	81	165	1.88429	3	235	4	124	86	36	41.9	26.1	56.5	7.53273	7.296	5.05825e-08	0.5	24.2	99.2	152	20.265	43	5.73287	7.377	4.19759e-08	0.1	24.5	145.5	4.2	7.5	23.3	10.3463	4.36888	123	124	482	474	1.6	1.8	166	163	16	7	5	5.3	11	0	0
2	65	m	92	173	2.05854	3	253	4	109	74	32	52.3	29.6	63.4	8.45266	7.272	5.34564e-08	1	24.6	97.7	108	14.3988	54.5	7.26609	7.305	4.9545e-08	0	24.4	142.5	5.05	10	31	13.5836	7.27062	354	535	20	406	0.8	0.8	141	144	18	5	8	6.5	12	0	0
2	58	m	78	175	1.93513	3	272	4	126	75	49	39	23.3	56.1	7.4794	7.323	4.75335e-08	2	25.2	94.1	70.8	9.43924	47.8	6.37282	7.363	4.33511e-08	1.3	25.5	139	5.2	9.8	30.3	12.8205	5.3133	239	160	901	204	1	1	203	203	20	9	5	6.2	12	0	0
2	70	m	82	162	1.86911	3	386	4	128	65	61	23.5	18.7	63.7	8.49265	7.142	7.21107e-08	-7.9	17	96	86.1	11.4791	45.6	6.07951	7.24	5.7544e-08	-7.6	18.2	144	3.2	9.45	29.25	12.6127	3.08742	440	385	6162	16532	5.5	5.8	223	214	32	10	5	6.2	12	0	0
2	70	m	90	182	2.11578	2	247	4	103	61	40	65.2	37	54.1	7.21276	7.264	5.44503e-08	-2.9	21.5	99.2	182	24.2647	48.8	6.50615	7.279	5.26017e-08	-4	21.1	137	4.4	9.15	28.35	12.6224	8.29361	598	730	20	20	1.3	1.3	154	150	22	10	7	5.9	10	0	0
2	78	f	60	153	1.5703	2	292	3	106	65	34	52.8	28.5	45.2	6.02618	7.32	4.7863e-08	-2.7	21.5	99.5	223	29.731	37.9	5.05293	7.361	4.35512e-08	-3.6	21.5	138	4.3	8	24.9	11.0713	5.87224	45	58	38	38	1.6	1.6	206	204	18	8	5	4.6	11	0	0
2	79	m	77	165	1.84417	3	263	5	149	90	59	48.2	25.8	37.6	5.01293	7.319	4.79733e-08	-6.3	18.7	99.5	173	23.0648	40	5.33291	7.382	4.14954e-08	-1.2	23.5	145	4	9	27.8	12.4528	6.03062	617	661	40	35	1.5	0.8	95	63	26	10	5	6.8	14	0	0
[truncated: 150 more columns]

## Sheet: Wilcoxon
O2S_VEN1	PO2_VEN1	PCO2VEN1	PCO2VEN_kPa1	PH_VEN_1	H_VEN_1	BE_VEN1	SBIC_V1	O2S_A_1	PO2_A1	PO2_A_kPa1	PCO2_A1	PCO2_A_kPa_1	PH_ART_1	H_ART_1	BE_A1	SBIC_A1	NAT_1	K_1	HB_1	HT_1	CAO2_A_1	CAO2_V_1	NA_A1	NA_V1	ADR_A1	ADR_V1	LAC_A_1	LAC_V_1	GLU_A_1	GLU_V_1	Pmax1	Pmean1	PEEP1	AMV1	AF1	APsys1	APdia1	APmean1	HR1	PCCO1	PCCI1	SV1	SVI1	SVmin1	SVmax1	SVV1	PPV1	CVP1	SVR1
82.9	50.9	57.2	7.626	7.303	4.97737e-08	1.2	25.3	99.6	298	39.7302	48.4	6.45282	7.343	4.53942e-08	0.3	24.8	146.5	4.05	8.2	25.45	11.3616	9.45052	307	301	972	493	1.1	0.9	92	98	19	8	5	7	10
48.9	26.2	48.4	6.45282	7.346	4.50817e-08	0.5	24.2	99.5	259	34.5306	38.9	5.18625	7.405	3.9355e-08	-0.2	24.3	132.5	5	8.35	25.9	11.5565	5.67639	109	166	20	20	0.9	0.6	159	159	18	8	5	7.4	14
42.1	24.3	55.2	7.35941	7.3	5.01187e-08	0	23.5	96.2	81	10.7991	46.7	6.22617	7.344	4.52898e-08	-0.5	23.9	144.5	4.95	9.6	29.8	12.8394	5.61858	528	546	20	20	1	0.8	132	127	18	7	5	6	12	86	46.6667	61.6667	103.667	6.73667	3.6	64.6667	34.3333	63.3333	69.3333	9	7.66667	7	643.923
41.9	26.1	56.5	7.53273	7.296	5.05825e-08	0.5	24.2	99.2	152	20.265	43	5.73287	7.377	4.19759e-08	0.1	24.5	145.5	4.2	7.5	23.3	10.3463	4.36888	123	124	482	474	1.6	1.8	166	163	16	7	5	5.3	11	85	49	63.3333	106.333	5.22667	2.76667	49	26	47.6667	53.3333	11.3333	12.3333	9	823.027
52.3	29.6	63.4	8.45266	7.272	5.34564e-08	1	24.6	97.7	108	14.3988	54.5	7.26609	7.305	4.9545e-08	0	24.4	142.5	5.05	10	31	13.5836	7.27062	354	535	20	406	0.8	0.8	141	144	18	5	8	6.5	12	81.3333	40.3333	56	82	5.76	2.80333	69	33.6667	88.3333	102.333	16.6667	14.3333	9	614.225
39	23.3	56.1	7.4794	7.323	4.75335e-08	2	25.2	94.1	70.8	9.43924	47.8	6.37282	7.363	4.33511e-08	1.3	25.5	139	5.2	9.8	30.3	12.8205	5.3133	239	160	901	204	1	1	203	203	20	9	5	6.2	12	120.667	59	79.6667	53.3333	4.47667	2.30667	83.6667	43	102.667	116	14	5.33333	9	1268.19
23.5	18.7	63.7	8.49265	7.142	7.21107e-08	-7.9	17	96	86.1	11.4791	45.6	6.07951	7.24	5.7544e-08	-7.6	18.2	144	3.2	9.45	29.25	12.6127	3.08742	440	385	6162	16532	5.5	5.8	223	214	32	10	5	6.2	12	69.6667	36.3333	47.3333	98	6.33333	3.38333	64.6667	34.6667	58	67.6667	14.6667	9.66667	13	432.665
65.2	37	54.1	7.21276	7.264	5.44503e-08	-2.9	21.5	99.2	182	24.2647	48.8	6.50615	7.279	5.26017e-08	-4	21.1	137	4.4	9.15	28.35	12.6224	8.29361	598	730	20	20	1.3	1.3	154	150	22	10	7	5.9	10	89.3333	54.6667	66	95	5.09333	2.4	53.3333	25.3333	51.3333	55.3333	7.33333	9	9	883.5
52.8	28.5	45.2	6.02618	7.32	4.7863e-08	-2.7	21.5	99.5	223	29.731	37.9	5.05293	7.361	4.35512e-08	-3.6	21.5	138	4.3	8	24.9	11.0713	5.87224	45	58	38	38	1.6	1.6	206	204	18	8	5	4.6	11	111.667	46.3333	70.6667	80.6667	4.08333	2.60667	50.3333	32.3333	54.6667	60	10.3333	7.66667	8	1231.47
48.2	25.8	37.6	5.01293	7.319	4.79733e-08	-6.3	18.7	99.5	173	23.0648	40	5.33291	7.382	4.14954e-08	-1.2	23.5	145	4	9	27.8	12.4528	6.03062	617	661	40	35	1.5	0.8	95	63	26	10	5	6.8	14	97.5	51.5	67.5	83.5	4.895	2.65	71	38.5	64	68	6	12	16	845
[truncated: 134 more columns]

## Sheet: MP I
PATCODE	1	2	3	4	5	6	7	8	9	10	MP I	Mittelwert	Median	Minimum	Maximum	Stabw.	Anzahl
No. Messreihe	1. (9)	2.(13)	3.(18)	4.(22)	5.(23)	6.(26)	9.(31)	10.(33)	11.(36)	12. (37)	No. Messreihe
Intervention	TIVA Kontrolle	TIVA Kontrolle	TIVA Kontrolle	TIVA Kontrolle	TIVA Kontrolle	TIVA Kontrolle	TIVA Kontrolle	TIVA Kontrolle	TIVA Kontrolle	TIVA Kontrolle	Intervention
ALTER	77	70	66	78	65	58	70	70	78	79	ALTER	71.1	70	58	79	6.91938	10
Geschlecht	m	m	m	f	m	m	m	m	f	m	Geschlecht
GEWICHT	81	63	77	81	92	78	82	90	60	77	GEWICHT	78.1	79.5	60	92	10.1374	10
GROESSE	170	163	172	165	173	175	162	182	153	165	GROESSE	168	167.5	153	182	8.12404	10
KOF	1.92552	1.6785	1.90057	1.88429	2.05854	1.93513	1.86911	2.11578	1.5703	1.84417	KOF	1.87819	1.89243	1.5703	2.11578	0.160177	10
KHK	3	2	3	3	3	3	3	2	2	3	KHK	2.7	3	2	3	0.483046	10
OP-Dauer	284	292	307	235	253	272	386	247	292	263	OP-Dauer	283.1	278	235	386	42.647	10
No. Of Grafts	4	4	4	4	4	4	4	4	3	5	No. Of Grafts	4	4	3	5	0.471405	10
PerfZeit	142	118	165	124	109	126	128	103	106	149	PerfZeit	127	125	103	165	19.9611	10
Ischämiezeit	92	80	92	86	74	75	65	61	65	90	Ischämiezeit	78	77.5	61	92	11.8134	10
RePerfZeit	48	35	65	36	32	49	61	40	34	59	RePerfZeit	45.9	44	32	65	12.3149	10
Blutkardioplegie	ja	ja	ja	ja	ja	ja	ja	ja	ja	ja	Blutkardioplegie
antegrad	ja	ja	ja	ja	ja	ja	ja	ja	ja	ja	antegrad
retrograd	ja	nein	ja	ja	nein	ja	ja	ja	nein	nein	retrograd
O2S_VEN1	82.9	48.9	42.1	41.9	52.3	39	23.5	65.2	52.8	48.2	O2S_VEN1	49.68	48.55	23.5	82.9	15.9209	10
PO2_VEN1	50.9	26.2	24.3	26.1	29.6	23.3	18.7	37	28.5	25.8	PO2_VEN1	29.04	26.15	18.7	50.9	9.01458	10
PCO2VEN1	57.2	48.4	55.2	56.5	63.4	56.1	63.7	54.1	45.2	37.6	PCO2VEN1	53.74	55.65	37.6	63.7	8.04076	10
PCO2VEN_kPa1	7.626	6.45282	7.35941	7.53273	8.45266	7.4794	8.49265	7.21276	6.02618	5.01293	PCO2VEN_kPa1	7.16475	7.41941	5.01293	8.49265	1.07201	10
PH_VEN_1	7.303	7.346	7.3	7.296	7.272	7.323	7.142	7.264	7.32	7.319	PH_VEN_1	7.2885	7.3015	7.142	7.346	0.0569137	10
H_VEN_1	4.97737e-08	4.50817e-08	5.01187e-08	5.05825e-08	5.34564e-08	4.75335e-08	7.21107e-08	5.44503e-08	4.7863e-08	4.79733e-08	H_VEN_1	5.18944e-08	4.99462e-08	4.50817e-08	7.21107e-08	7.63109e-09	10
BE_VEN1	1.2	0.5	0	0.5	1	2	-7.9	-2.9	-2.7	-6.3	BE_VEN1	-1.46	0.25	-7.9	2	3.38992	10
SBIC_V1	25.3	24.2	23.5	24.2	24.6	25.2	17	21.5	21.5	18.7	SBIC_V1	22.57	23.85	17	25.3	2.84724	10
O2S_A_1	99.6	99.5	96.2	99.2	97.7	94.1	96	99.2	99.5	99.5	O2S_A_1	98.05	99.2	94.1	99.6	1.9637	10
PO2_A_1	298	259	81	152	108	70.8	86.1	182	223	173	PO2_A_1	163.29	162.5	70.8	298	78.7299	10
PO2_A_kPa1	39.7302	34.5306	10.7991	20.265	14.3988	9.43924	11.4791	24.2647	29.731	23.0648	PO2_A_kPa1	21.7703	21.6649	9.43924	39.7302	10.4965	10
PCO2_A_1	48.4	38.9	46.7	43	54.5	47.8	45.6	48.8	37.9	40	PCO2_A_1	45.16	46.15	37.9	54.5	5.20367	10
PCO2_A_kPa_1	6.45282	5.18625	6.22617	5.73287	7.26609	6.37282	6.07951	6.50615	5.05293	5.33291	PCO2_A_kPa_1	6.02085	6.15284	5.05293	7.26609	0.693768	10
PH_ART_1	7.343	7.405	7.344	7.377	7.305	7.363	7.24	7.279	7.361	7.382	PH_ART_1	7.3399	7.3525	7.24	7.405	0.0508799	10
H_ART_1	4.53942e-08	3.9355e-08	4.52898e-08	4.19759e-08	4.9545e-08	4.33511e-08	5.7544e-08	5.26017e-08	4.35512e-08	4.14954e-08	H_ART_1	4.60103e-08	4.44205e-08	3.9355e-08	5.7544e-08	5.61682e-09	10
BE_A1	0.3	-0.2	-0.5	0.1	0	1.3	-7.6	-4	-3.6	-1.2	BE_A1	-1.54	-0.35	-7.6	1.3	2.71874	10
SBIC_A1	24.8	24.3	23.9	24.5	24.4	25.5	18.2	21.1	21.5	23.5	SBIC_A1	23.17	24.1	18.2	25.5	2.23758	10
NAT_1	146.5	132.5	144.5	145.5	142.5	139	144	137	138	145	NAT_1	141.45	143.25	132.5	146.5	4.5853	10
K_1	4.05	5	4.95	4.2	5.05	5.2	3.2	4.4	4.3	4	K_1	4.435	4.35	3.2	5.2	0.622294	10
HB_1	8.2	8.35	9.6	7.5	10	9.8	9.45	9.15	8	9	HB_1	8.905	9.075	7.5	10	0.846381	10
HT_1	25.45	25.9	29.8	23.3	31	30.3	29.25	28.35	24.9	27.8	HT_1	27.605	28.075	23.3	31	2.58859	10
CAO2_A_1	11.3616	11.5565	12.8394	10.3463	13.5836	12.8205	12.6127	12.6224	11.0713	12.4528	CAO2_A_1	12.1267	12.5328	10.3463	13.5836	0.994117	10
CAO2_V_1	9.45052	5.67639	5.61858	4.36888	7.27062	5.3133	3.08742	8.29361	5.87224	6.03062	CAO2_V_1	6.09822	5.77432	3.08742	9.45052	1.84293	10
NA_A1	307	109	528	123	354	239	440	598	45	617	NA_A1	336	330.5	45	617	207.482	10
NA_V1	301	166	546	124	535	160	385	730	58	661	NA_V1	366.6	343	58	730	240.585	10
ADR_A1	972	20	20	482	20	901	6162	20	38	40	ADR_A1	867.5	39	20	6162	1898.49	10
ADR_V1	493	20	20	474	406	204	16532	20	38	35	ADR_V1	1824.2	121	20	16532	5171.59	10
LAC_A_1	1.1	0.9	1	1.6	0.8	1	5.5	1.3	1.6	1.5	LAC_A_1	1.63	1.2	0.8	5.5	1.39048	10
LAC_V_1	0.9	0.6	0.8	1.8	0.8	1	5.8	1.3	1.6	0.8	LAC_V_1	1.54	0.95	0.6	5.8	1.54575	10
MLE_1	18.1818	33.3333	20	-12.5	0	0	-5.45455	0	0	46.6667	MLE_1	10.0227	0	-12.5	46.6667	18.8589	10
GLU_A_1	92	159	132	166	141	203	223	154	206	95	GLU_A_1	157.1	156.5	92	223	44.618	10
GLU_V_1	98	159	127	163	144	203	214	150	204	63	GLU_V_1	152.5	154.5	63	214	48.1277	10
Endothelin_A_1											Endothelin_A_1	#DIV/0!	#NUM!	0	0	#DIV/0!	0
Endothelin_V_1											Endothelin_V_1	#DIV/0!	#NUM!	0	0	#DIV/0!	0
Pmax	19	18	18	16	18	20	32	22	18	26	Pmax	20.7	18.5	16	32	4.85455	10
Pmean	8	8	7	7	5	9	10	10	8	10	Pmean	8.2	8	5	10	1.61933	10
PEEP	5	5	5	5	8	5	5	7	5	5	PEEP	5.5	5	5	8	1.08012	10
AMV	7	7.4	6	5.3	6.5	6.2	6.2	5.9	4.6	6.8	AMV	6.19	6.2	4.6	7.4	0.818467	10
AF	10	14	12	11	12	12	12	10	11	14	AF	11.8	12	10	14	1.39841	10
APsys			86	85	81.3333	120.667	69.6667	89.3333	111.667	97.5	APsys	92.6458	87.6667	69.6667	120.667	16.6482	8
APdia			46.6667	49	40.3333	59	36.3333	54.6667	46.3333	51.5	APdia	47.9792	47.8333	36.3333	59	7.34979	8
APmean			61.6667	63.3333	56	79.6667	47.3333	66	70.6667	67.5	APmean	64.0208	64.6667	47.3333	79.6667	9.66438	8
HR			103.667	106.333	82	53.3333	98	95	80.6667	83.5	HR	87.8125	89.25	53.3333	106.333	17.08	8
PCCO			6.73667	5.22667	5.76	4.47667	6.33333	5.09333	4.08333	4.895	PCCO	5.32563	5.16	4.08333	6.73667	0.903043	8
PCCI			3.6	2.76667	2.80333	2.30667	3.38333	2.4	2.60667	2.65	PCCI	2.81458	2.70833	2.30667	3.6	0.454022	8
SV			64.6667	49	69	83.6667	64.6667	53.3333	50.3333	71	SV	63.2083	64.6667	49	83.6667	11.8455	8
SVI			34.3333	26	33.6667	43	34.6667	25.3333	32.3333	38.5	SVI	33.4792	34	25.3333	43	5.87532	8
SVmin			63.3333	47.6667	88.3333	102.667	58	51.3333	54.6667	64	SVmin	66.25	60.6667	47.6667	102.667	19.2632	8
SVmax			69.3333	53.3333	102.333	116	67.6667	55.3333	60	68	SVmax	74	67.8333	53.3333	116	22.7917	8
SVV%			9	11.3333	16.6667	14	14.6667	7.33333	10.3333	6	SVV%	11.1667	10.8333	6	16.6667	3.72891	8
PPV%			7.66667	12.3333	14.3333	5.33333	9.66667	9	7.66667	12	PPV%	9.75	9.33333	5.33333	14.3333	2.96407	8
CVP			7	9	9	9	13	9	8	16	CVP	10	9	7	16	2.9761	8
SVR			643.923	823.027	614.225	1268.19	432.665	883.5	1231.47	845	SVR	842.751	834.013	432.665	1268.19	291.323	8
SVRI			1223.82	1550.82	1264.41	2454.12	808.7	1869.29	1933.77	1559	SVRI	1582.99	1554.91	808.7	2454.12	506.46	8
dPmx			816.667	506.667	806.667	1063.33	723.333	596.667	966.667	725	dPmx	775.625	765.833	506.667	1063.33	181.888	8
TBlood			37.6667	37.3	36.0667	36.3667	35.9667	36.2667	36.5333	37.1	TBlood	36.6583	36.45	35.9667	37.6667	0.621761	8
CO			6.79	5.28	6.12	4.45667	6.34667	5.16	4.07	5.685	CO	5.48854	5.4825	4.07	6.79	0.933194	8
GEDV			1671.67	1187.33	1267.33	1266	1269.33	1297.33	846.667	1525.5	GEDV	1291.4	1268.33	846.667	1671.67	241.947	8
ITBV			2089	1484	1583.67	1582	1586.33	1621.33	1058	1906.5	ITBV	1613.85	1585	1058	2089	302.367	8
EVLW			515.333	460.333	528.333	783.333	581.667	590	365	647.5	EVLW	558.938	555	365	783.333	125.272	8
CI			3.63333	2.80333	2.98667	2.30333	3.39667	2.43333	2.60333	3.085	CI	2.90562	2.895	2.30333	3.63333	0.46246	8
CFI			4.03333	4.4	4.76667	3.46667	5	3.9	4.76667	3.65	CFI	4.24792	4.21667	3.46667	5	0.568445	8
GEF			14.6667	16.3333	21.6667	26	20	15.5	23.3333	15	GEF	19.0625	18.1667	14.6667	26	4.3094	8
GEDI			894.667	630	618	653.667	679	612.333	541	827	GEDI	681.958	641.833	541	894.667	118.682	8
ITBI			1118	787	772.333	817	848.667	765.333	676.333	1033.5	ITBI	852.271	802	676.333	1118	148.264	8
ELWI			7	5.66667	6	10	7	6.66667	6.33333	8	ELWI	7.08333	6.83333	5.66667	10	1.37725	8
PVPI			1.16667	1.53333	1.63333	2.5	1.76667	1.76667	1.7	1.65	PVPI	1.71458	1.675	1.16667	2.5	0.371552	8
InjVol			15	15	15	15	15	15	15	15	InjVol	15	15	15	15	0	8
TI			8.33333	12.3333	12.6667	16.6667	19	9.33333	4.33333	5.5	TI	11.0208	10.8333	4.33333	19	5.1443	8
MTt			22.6667	21.6667	20.3333	31.6667	20	25.3333	20.6667	26.5	MTt	23.6042	22.1667	20	31.6667	4.02368	8
DST			7.66667	8	8	14.6667	8	10.3333	8	10.5	DST	9.39583	8	7.66667	14.6667	2.41019	8
dia PI Mean	1.10103	0.341756	0.699958	1.00338	0.701024	0.395749	1.36656	0.375559	0.841603	0.571291	dia PI Mean	0.739791	0.700491	0.341756	1.36656	0.340608	10
dia PI Median	0.966539	0.346456	0.667614	1.08437	0.655264	0.397025	1.36726	0.371047	0.824974	0.575955	dia PI Median	0.72565	0.661439	0.346456	1.36726	0.336071	10
PI	1.3	2.1	3.1	2	2.6	2.3	3.8	2.7	2.5	2.4	PI	2.48	2.45	1.3	3.8	0.666333	10
Autoregulationsindex	2.95416	2.20272	4.10893	5.33728	2.87727	1.58967	3.82043	3.25633	2.4432	1.76186	Autoregulationsindex	3.03518	2.91571	1.58967	5.33728	1.15007	10
Probe	3	3	2	2	3	2	2	3	2	2	Probe	2.4	2	2	3	0.516398	10
Flowdia	33.6422	15.709	38.211	14.3079	24.6061	12.888	9.75266	28.2492	27.0341	34.6265	Flowdia	23.9027	25.8201	9.75266	38.211	10.1353	10
A	-130.951	-17.2943	-106.006	-74.5799	-51.6304	-16.7552	-49.416	-59.1448	-42.373	-33.1408	A	-58.1291	-50.5232	-130.951	-16.7552	36.8736	10
B	2.70959	0.73866	2.37351	1.6453	1.45898	0.47542	1.17223	1.39218	1.33007	1.0524	B	1.43483	1.36113	0.47542	2.70959	0.681839	10
R	0.969459	0.914133	0.918755	0.937886	0.942237	0.880682	0.962973	0.947483	0.966279	0.977435	R	0.941732	0.94486	0.880682	0.977435	0.0301148	10
R²	0.93985	0.83564	0.84411	0.87963	0.88781	0.7756	0.927316	0.897724	0.933695	0.95538	R²	0.887675	0.892767	0.7756	0.95538	0.0561026	10
ZFP	48.3287	23.4131	44.6621	45.3291	35.388	35.2429	42.1556	42.4835	31.8576	31.4906	ZFP	38.0351	38.7718	23.4131	48.3287	7.8134	10
DDT	327	774	343	257	550	1215					DDT	577.667	446.5	257	1215	365.03	6
Kardioplegietyp	Blut	Blut	Blut	Blut	Blut	Blut	Blut	Blut	Blut	Blut	Kardioplegietyp
HF	93	82	103	108	84	57	102	83	83	79	HF	87.4	83.5	57	108	14.8563	10
CSP	15.86	13.885	14.5553	14.266	9.484	11.363	18	13.674	7.99723	12.379	CSP	13.1464	13.7795	7.99723	18	2.95673	10
ZFP/CSP	3.04721	1.68621	3.06844	3.17742	3.73134	3.10155	2.3	3.10688	3.98359	2.54388	ZFP/CSP	2.97465	3.085	1.68621	3.98359	0.665004	10
Paorta	60.7448	44.68	60.76	54.025	51.958	61.86	50.5	62.7748	52.1829	64.393	Paorta	56.3879	57.3849	44.68	64.393	6.56207	10
LVEDP	33.374	12.718	22.596	29.82	14.368	9.676	21.6	14.082	7.81	18.202	LVEDP	18.4246	16.285	7.81	33.374	8.41929	10
ZFP/LVEDP	1.44809	1.84094	1.97655	1.52009	2.46297	3.6423	1.951	3.01687	4.07908	1.73006	ZFP/LVEDP	2.3668	1.96378	1.44809	4.07908	0.916439	10
LVPdiast	24.591	10.236	15	20.506	6.67	8.329	18.039	8.4244	4.577	13.5672	LVPdiast	12.994	11.9016	4.577	24.591	6.51335	10
Datapairs	237	571	494	434	745	1636	444	571	767	926	Datapairs	682.5	571	237	1636	388.302	10
Data per beat	47.4	114.2	98.8	86.8	149	327.2	88.8	114.2	153.4	185.2	Data per beat	136.5	114.2	47.4	327.2	77.6603	10
Beats	5	5	5	5	5	5	5	5	5	5	Beats	5	5	5	5	0	10
Diastole	0.237	0.2284	0.1976	0.1736	0.298	0.6544	0.1776	0.2284	0.3068	0.3704	Diastole	0.28722	0.2327	0.1736	0.6544	0.143232	10

## Sheet: MP II
PATCODE	1	2	3	4	5	6	7	8	9	10	MP II	Mittelwert	Median	Minimum	Maximum	Stabw.	Anzahl
No. Messreihe	1.(9)	2.(13)	3.(18)	4.(22)	5.(23)	6.(26)	9.(31)	10.(33)	11.(36)	12. (37)	No. Messreihe
Intervention	TIVA Kontrolle	TIVA Kontrolle	TIVA Kontrolle	TIVA Kontrolle	TIVA Kontrolle	TIVA Kontrolle	TIVA Kontrolle	TIVA Kontrolle	TIVA Kontrolle	TIVA Kontrolle	Intervention
Alter	77	70	66	78	65	58	70	70	78	79	Alter	71.1	70	58	79	6.91938	10
GEWICHT	81	63	77	81	92	78	82	90	60	77	GEWICHT	78.1	79.5	60	92	10.1374	10
GROESSE	170	163	172	165	173	175	162	182	153	165	GROESSE	168	167.5	153	182	8.12404	10
KOF	1.92552	1.6785	1.90057	1.88429	2.05854	1.93513	1.86911	2.11578	1.5703	1.84417	KOF	1.87819	1.89243	1.5703	2.11578	0.160177	10
O2S_VEN2	74.9	42.9	39.3	44	46.5	41.1	46.1	50.9	54.2	48.9	O2S_VEN2	48.88	46.3	39.3	74.9	10.1909	10
PO2_VEN2	43.3	24.1	24	26.3	26.9	24.4	28.2	29.9	29.8	26.5	PO2_VEN2	28.34	26.7	24	43.3	5.67983	10
PCO2VEN2	57.1	51.2	61.1	57.4	62.4	57.5	62	58.7	48.3	55.3	PCO2VEN2	57.1	57.45	48.3	62.4	4.55095	10
PCO2VEN_kPa2	7.61272	6.82612	8.14601	7.65272	8.31933	7.66605	8.26601	7.82604	6.43948	7.37274	PCO2VEN_kPa2	7.61272	7.65939	6.43948	8.31933	0.606744	10
PH_VEN_2	7.299	7.323	7.269	7.3	7.275	7.313	7.168	7.24	7.299	7.298	PH_VEN_2	7.2784	7.2985	7.168	7.323	0.0455197	10
H_VEN_2	5.02343e-08	4.75335e-08	5.3827e-08	5.01187e-08	5.30884e-08	4.86407e-08	6.79204e-08	5.7544e-08	5.02343e-08	5.03501e-08	H_VEN_2	5.29491e-08	5.02922e-08	4.75335e-08	6.79204e-08	5.99481e-09	10
BE_VEN2	0.8	0	-0.2	1.1	0.9	1.9	-6.8	-2.9	-2.8	-0.1	BE_VEN2	-0.81	-0.05	-6.8	1.9	2.62993	10
SBIC_V2	24.8	23.7	23.2	24.7	24.4	25.2	18.1	21.3	21.5	23.6	SBIC_V2	23.05	23.65	18.1	25.2	2.18441	10
O2S_A_2	99.7	99.1	98.2	98.9	97.5	98.7	93.7	99.9	99.5	99.3	O2S_A_2	98.45	99	93.7	99.9	1.81674	10
PO2_A_2	364	141	109	131	165	124	75	202	229	167	PO2_A_2	170.7	153	75	364	81.2363	10
PO2_A_kPa2	48.5295	18.7985	14.5322	17.4653	22	16.532	9.9992	26.9312	30.5309	22.2649	PO2_A_kPa2	22.7584	20.3992	9.9992	48.5295	10.8306	10
PCO2_A_2	48.7	41.6	50.9	46.3	50.5	46.7	50	51.7	39.7	41.9	PCO2_A_2	46.8	47.7	39.7	51.7	4.34716	10
PCO2_A_kPa_2	6.49281	5.54622	6.78612	6.17284	6.73279	6.22617	6.66613	6.89278	5.29291	5.58622	PCO2_A_kPa_2	6.2395	6.35949	5.29291	6.89278	0.579575	10
PH_ART_2	7.342	7.376	7.303	7.36	7.334	7.368	7.222	7.264	7.347	7.362	PH_ART_2	7.3278	7.3445	7.222	7.376	0.0501482	10
H_ART_2	4.54988e-08	4.20727e-08	4.97737e-08	4.36516e-08	4.63447e-08	4.28549e-08	5.99791e-08	5.44503e-08	4.4978e-08	4.3451e-08	H_ART_2	4.73055e-08	4.52384e-08	4.20727e-08	5.99791e-08	5.80003e-09	10
BE_A2	0.4	-0.8	-1.7	0.5	0.4	1.1	-7.2	-4	-3.6	-1.6	BE_A2	-1.65	-1.2	-7.2	1.1	2.6129	10
SBIC_A2	24.8	23.8	23	24.9	24.8	25.5	18.5	21.1	21.4	23.1	SBIC_A2	23.09	23.45	18.5	25.5	2.19416	10
NAT_2	147	133	145.5	145.5	142.5	140	144	138	138	145	NAT_2	141.85	143.25	133	147	4.46623	10
K_2	3.9	4.8	4.5	4	4.95	5	3.2	4.3	4.2	3.7	K_2	4.255	4.25	3.2	5	0.578528	10
HB_2	8.4	7.8	10.9	7.85	9.95	9.6	9.7	8.95	8.1	9	HB_2	9.025	8.975	7.8	10.9	1.01605	10
HT_2	26.1	25.85	33.75	24.45	30.8	29.7	30.05	27.75	25.2	27.9	HT_2	28.155	27.825	24.45	33.75	2.91552	10
CAO2_A_2	11.6523	10.7488	14.8817	10.7955	13.4899	13.1744	12.6359	12.4343	11.2098	12.4276	CAO2_A_2	12.345	12.431	10.7488	14.8817	1.3017	10
CAO2_V_2	8.74667	4.65197	5.95509	4.80188	6.43202	5.48514	6.21654	6.33314	6.1033	6.11821	CAO2_V_2	6.08439	6.11076	4.65197	8.74667	1.12358	10
NA_A_2	245	97	605	297	387	120	862	498	48	542	NA_A_2	370.1	342	48	862	259.318	10
NA_V_2	266	138	883	595	523	87	795	510	62	594	NA_V_2	445.3	516.5	62	883	292.593	10
ADR_A_2	1030	20	45	397	32	595	5969	20	20	50	ADR_A_2	817.8	47.5	20	5969	1841.51	10
ADR_V_2	988	20	29	1073	20	467	4777	20	20	107	ADR_V_2	752.1	68	20	4777	1472.81	10
LAC_A_2	1	0.8	0.8	1.7	0.8	1	5.2	1.3	1.5	1.2	LAC_A_2	1.53	1.1	0.8	5.2	1.32585	10
LAC_V_2	1	0.5	0.6	1.5	0.9	1	5.3	1.3	1.4	1	LAC_V_2	1.45	1	0.5	5.3	1.38984	10
MLE_2	0	37.5	25	11.7647	-12.5	0	-1.92308	0	6.66667	16.6667	MLE_2	8.3175	3.33333	-12.5	37.5	14.7574	10
GLU_A_2	91	147	123	161	137	196	229	143	192	75	GLU_A_2	149.4	145	75	229	47.4932	10
GLU_V_2	92	147	120	161	136	193	225	144	190	73	GLU_V_2	148.1	145.5	73	225	46.6582	10
Endothelin_A_2											Endothelin_A_2	#DIV/0!	#NUM!	0	0	#DIV/0!	0
Endothelin_V_2											Endothelin_V_2	#DIV/0!	#NUM!	0	0	#DIV/0!	0
Pmax	21	18	20	17	21	21	22	22	17	30	Pmax	20.9	21	17	30	3.72529	10
Pmean	7	8	8	8	10	10	9	10	7	11	Pmean	8.8	8.5	7	11	1.39841	10
PEEP	4	5	5	5	5	5	5	7	5	5	PEEP	5.1	5	4	7	0.737865	10
AMV	7	7.3	6.4	5.76	7.3	7	6.5	5.8	4.5	7.1	AMV	6.466	6.75	4.5	7.3	0.892938	10
AF	10	14	12	12	11	12	12	10	11	15	AF	11.9	12	10	15	1.59513	10
APsys			101	95.6667	82.6667	97.3333	84.6667	82.6667	88.3333	124	APsys	94.5417	92	82.6667	124	13.8185	8
APdia			58.6667	52.6667	43.6667	55.3333	46.3333	54.3333	37.3333	60.6667	APdia	51.125	53.5	37.3333	60.6667	7.99194	8
APmean			73.6667	69.6667	57.6667	67.6667	58.6667	64.3333	56	84.3333	APmean	66.5	66	56	84.3333	9.52524	8
HR			106	104	81	56.3333	101.667	96.3333	70.3333	82.6667	HR	87.2917	89.5	56.3333	106	17.8267	8
PCCO			5.43333	5.95667	5.44333	3.97667	4.90333	4.71	3.62333	5.08333	PCCO	4.89125	4.99333	3.62333	5.95667	0.778986	8
PCCI			2.9	3.15667	2.65	2.04667	2.61667	2.21667	2.31	2.75	PCCI	2.58083	2.63333	2.04667	3.15667	0.37022	8
SV			51	57	67	70.3333	48	48.6667	51	61	SV	56.75	54	48	70.3333	8.58339	8
SVI			27.3333	30.3333	32.6667	36.3333	26	23	32.3333	33.3333	SVI	30.1667	31.3333	23	36.3333	4.40418	8
SVmin			50.3333	53.3333	60	67.5	48.3333	45.6667	45.6667	57.3333	SVmin	53.5208	51.8333	45.6667	67.5	7.67569	8
SVmax			59.6667	56.6667	69.3333	76	57.6667	50	51	63	SVmax	60.4167	58.6667	50	76	8.85106	8
SVV%			18.3333	5.33333	13.6667	12.5	17.6667	8.33333	10.6667	10	SVV%	12.0625	11.5833	5.33333	18.3333	4.4543	8
PPV%			9	3	21.3333	10.3333	15.6667	13.6667	10.6667	7.33333	PPV%	11.375	10.5	3	21.3333	5.56188	8
CVP			7	9	9	9	13	9	8	16	CVP	10	9	7	16	2.9761	8
SVR			969.455	815.939	691.361	1133.37	725.166	950.371	1012.05	1065.36	SVR	920.384	959.913	691.361	1133.37	160.162	8
SVRI			1842.51	1537.47	1423.19	2193.22	1355.42	2010.78	1589.22	1964.71	SVRI	1739.56	1715.87	1355.42	2193.22	305.135	8
dPmx			853.333	610	693.333	736.667	790	500	820	886.667	dPmx	736.25	763.333	500	886.667	130.839	8
TBlood			37.7	36.7667	35.7	36.2333	35.7	36.1667	36.1333	37	TBlood	36.425	36.2	35.7	37.7	0.687935	8
CO			5.5	5.94667	5.63	4.14	5.03667	4.65667	3.79333	5.13	CO	4.97917	5.08333	3.79333	5.94667	0.743675	8
GEDV			1651	1189.33	1381.33	1483	1110.33	1334.67	943.667	1503	GEDV	1324.54	1358	943.667	1651	231.792	8
ITBV			2063.33	1486.67	1726.33	1853.33	1387.67	1668	1179	1878.33	ITBV	1655.33	1697.17	1179	2063.33	289.725	8
EVLW			510.667	422.667	574	617.667	555	551	385	640.333	EVLW	532.042	553	385	640.333	89.2403	8
CI			2.94333	3.15333	2.74667	2.13667	2.69667	2.2	2.42667	2.78333	CI	2.63583	2.72167	2.13667	3.15333	0.35516	8
CFI			3.3	4.96667	4.03333	2.76667	4.5	3.43333	3.96667	3.36667	CFI	3.79167	3.7	2.76667	4.96667	0.714421	8
GEF			12	18.6667	19	18.6667	17	14	21.3333	16	GEF	17.0833	17.8333	12	21.3333	3.00661	8
GEDI			883.333	631	673.667	765.667	593.667	630	603.333	815	GEDI	699.458	652.333	593.667	883.333	108.333	8
ITBI			1104	789	842	957	742.333	787.333	753.667	1018.67	ITBI	874.25	815.5	742.333	1104	135.38	8
ELWI			6.33333	5	6	8	7	6	6.33333	8.66667	ELWI	6.66667	6.33333	5	8.66667	1.18187	8
PVPI			1.23333	1.36667	1.63333	1.63333	1.93333	1.6	1.56667	1.66667	PVPI	1.57917	1.61667	1.23333	1.93333	0.2085	8
InjVol			15	15	15	15	15	15	15	15	InjVol	15	15	15	15	0	8
TI			5.33333	13	13.3333	5	9.33333	16	4	10	TI	9.5	9.66667	4	16	4.42934	8
MTt			27.6667	19	24.3333	35.3333	22.6667	28	24.3333	29	MTt	26.2917	26	19	35.3333	4.89716	8
DST			9.66667	7	9.33333	13.6667	9.66667	11	9.66667	11.3333	DST	10.1667	9.66667	7	13.6667	1.91899	8
dia PI Mean	0.640985	0.418634	0.389331	0.557944	0.799795	0.417355	0.728391	0.324569	0.879314	0.581777	dia PI Mean	0.57381	0.569861	0.324569	0.879314	0.187923	10
dia PI Median	0.607981	0.418341	0.386805	0.579726	0.692128	0.423893	0.772915	0.317693	0.879327	0.581364	dia PI Median	0.566017	0.580545	0.317693	0.879327	0.181	10
PI	1.2	2.5	2.9	2.8	2.6	2.6	2.6	2.5	2.7	2.7	PI	2.51	2.6	1.2	2.9	0.477144	10
Autoregulationsindex	1.98199	2.94376	3.10605	3.19588	3.45008	1.84322	2.43631	3.85963	2.44663	1.95444	Autoregulationsindex	2.7218	2.69519	1.84322	3.85963	0.692181	10
Probe	3	3	2	2	3	2	2	3	2	2	Probe	2.4	2	2	3	0.516398	10
Flowdia	53.2611	16.42	29.8505	31.7714	19.871	9.4426	14.7537	35.5194	22.275	21.0174	Flowdia	25.4182	21.6462	9.4426	53.2611	12.6807	10
A	-80.5436	-30.087	-58.39	-91.2	-61.633	-19.7402	-34.5217	-82.3592	-36.9635	-27.8824	A	-52.3321	-47.6767	-91.2	-19.7402	25.9052	10
B	2.10156	1.07	1.33	2.09772	1.42919	0.46108	0.864419	1.85421	1.24126	0.689737	B	1.31392	1.28563	0.46108	2.10156	0.569985	10
R	0.959818	0.959583	0.940697	0.962933	0.917911	0.833343	0.959184	0.928352	0.966041	0.971376	R	0.939924	0.959384	0.833343	0.971376	0.041275	10
R²	0.92125	0.9208	0.88491	0.92724	0.84256	0.69446	0.920034	0.861837	0.933235	0.943572	R²	0.88499	0.920417	0.69446	0.943572	0.0745414	10
ZFP	38.3256	28.1187	43.9023	43.4758	43.1244	42.813	39.9363	44.4173	29.7791	40.4247	ZFP	39.4317	41.6188	28.1187	44.4173	5.86787	10
DDT	488	668	451	366	489	1070					DDT	588.667	488.5	366	1070	255.568	6
Kardioplegietyp	Blut	Blut	Blut	Blut	Blut	Blut	Blut	Blut	Blut	Blut	Kardioplegietyp
HF	88	82	106	103	85	54	101	96	70	83	HF	86.8	86.5	54	106	16.0472	10
CSP	12.62	13.038	17.399	13.191	9.6955	10.8176	15.4466	12.7607	7.08299	17.9506	CSP	13.0002	12.8993	7.08299	17.9506	3.34628	10
ZFP/CSP	3.0369	2.15667	2.52326	3.29587	4.44788	3.95773	2.58545	3.4808	4.20431	2.252	ZFP/CSP	3.19409	3.16638	2.15667	4.44788	0.821731	10
Paorta	62.653	43.422	66.55	57.967	57.028	62.889	57.0041	63.5734	47.7246	70.8963	Paorta	58.9707	60.31	43.422	70.8963	8.34431	10
LVEDP	30.058	11.89	23.964	23.1	14.25	9.672	16.108	10.956	7.772	19.642	LVEDP	16.7412	15.179	7.772	30.058	7.24481	10
ZFP/LVEDP	1.27506	2.3649	1.83201	1.88207	3.02628	4.42648	2.47928	4.05416	3.83159	2.05808	ZFP/LVEDP	2.72299	2.42209	1.27506	4.42648	1.06573	10
LVPdiast	17.0123	10.109	15.94	12.789	6.3834	7.685	14.6368	8.69209	4.61397	16.1803	LVPdiast	11.4042	11.449	4.61397	17.0123	4.4893	10
Datapairs	253	602	446	401	763	1536	581	437	908	751	Datapairs	667.8	591.5	253	1536	362.862	10
Data per beat	50.6	120.4	89.2	80.2	152.6	307.2	116.2	87.4	181.6	150.2	Data per beat	133.56	118.3	50.6	307.2	72.5725	10
Beats	5	5	5	5	5	5	5	5	5	5	Beats	5	5	5	5	0	10
Diastole	0.253	0.2408	0.1784	0.1604	0.3052	0.6144	0.2324	0.1748	0.3632	0.3004	Diastole	0.2823	0.2469	0.1604	0.6144	0.13332	10
