# Supplementary material for: Influence of isoflurane on the diastolic pressure-flow relationship and critical occlusion pressure during arterial CABG surgery: a randomized controlled trial
Source: PeerJ. 2016 Jan 26;4:e1619. doi: 10.7717/peerj.1619 (PMC4783760; doi:10.7717/peerj.1619)
Supplement: Supplemental Information 4 — All variables are clearly presented. [file peerj-04-1619-s004.xls]

## Sheet: .LIMAB_MP1
Bypass	Zeitpunkt	dia PI Mean	dia PI Median	PI	Autoregulationsindex	Probe	Flowdia	A	B	p(Sign.)	R	R²	ZFP	KP	Kardioplegietyp	HF	CSP	ZFP/CSP	Paorta	LVEDP	ZFP/LVEDP	LVPdiast	Datapairs	Data per beat	Beats	Diastole
LIMABRIVA	MP 1	1.10103	0.966539	1.3	2.95416	3	33.6422	-130.951	2.70959		0.969459	0.93985	48.3287	1	Blut	93	15.86	3.04721	60.7448	33.374	1.44809	24.591	237	47.4	5	0.237
LIMABRIVA	MP 1	0.341756	0.346456	2.1	2.20272	3	15.709	-17.2943	0.73866		0.914133	0.83564	23.4131	1	Blut	82	13.885	1.68621	44.68	12.718	1.84094	10.236	571	114.2	5	0.2284
LIMABRIVA	MP 1	0.699958	0.667614	3.1	4.10893	2	38.211	-106.006	2.37351		0.918755	0.84411	44.6621	1	Blut	103	14.5553	3.06844	60.76	22.596	1.97655	15	494	98.8	5	0.1976
LIMABRIVA	MP 1	1.00338	1.08437	2	5.33728	2	14.3079	-74.5799	1.6453		0.937886	0.87963	45.3291	1	Blut	108	14.266	3.17742	54.025	29.82	1.52009	20.506	434	86.8	5	0.1736
LIMABRIVA	MP 1	0.713504	0.657805	2.6	2.86383	3	24.176	-51.6304	1.45898		0.942237	0.88781	35.388	1	Blut	84	9.484	3.73134	51.958	14.368	2.46297	6.67	779	155.8	5	0.3116
LIMABRIVA	MP 1	0.395749	0.397025	2.3	1.58967	2	12.888	-16.7552	0.47542		0.880682	0.7756	35.2429	1	Blut	57	11.363	3.10155	61.86	9.676	3.6423	8.329	1636	327.2	5	0.6544
LIMABRIVA	MP 1	0.619566	0.587757	3	3.04734	3	20.0399	-8.85372	0.428346		0.506443	0.256484	20.6695	1	Blut	87	13.81	1.49671	67.45	9.47	2.18263	7.234	567	113.4	5	0.2268
LIMABRIVA	MP 1	0.32599	0.318943	1.4	1.79881	3	33.0118	-14.5896	0.87361		0.81008	0.65623	16.7004	1	Blut	111	17.6261	0.947478	54.4884	10.852	1.53892	9.03121	379	75.8	5	0.1516
LIMABRIVA	MP 1	1.36656	1.36726	3.7	3.82043	2	9.75266	-49.416	1.17223		0.962973	0.927316	42.1556	1	Blut	102	17.9854	2.34388	50.4754	21.612	1.95057	18.0394	444	88.8	5	0.1776
LIMAB RIVA	MP 1	0.375559	0.371047	2.7	3.25633	3	28.2492	-59.1448	1.39218		0.947483	0.897724	42.4835	1	Blut	83	13.674	3.10688	62.7748	14.082	3.01687	8.4244	571	114.2	5	0.2284
LIMABRIVA	MP 1	0.841603	0.824974	2.5	2.4432	2	27.0341	-42.373	1.33007		0.966279	0.933695	31.8576	1	Blut	83	7.99723	3.98359	52.1829	7.81	4.07908	4.577	766	153.2	5	0.3064
LIMABRIVA	MP 1	0.571291	0.575955	2.4	1.76186	2	34.6265	-33.1408	1.0524		0.977435	0.95538	31.4906	1	Blut	79	12.379	2.54388	64.393	18.202	1.73006	13.5672	926	185.2	5	0.3704
		dia PI Mean	dia PI Median	PI	Autoregulationsindex	Probe	Flowdia	A	B	p(Sign.)	R	R²	ZFP		Kardioplegietyp	HF	CSP	ZFP/CSP	Paorta	LVEDP	ZFP/LVEDP	LVPdiast
Mittelwert		0.696329	0.680479	2.425	2.93205		24.304	-50.3946	1.30419	#DIV/0!	0.894487	0.815789	34.8101			89.3333	13.5738	2.68621	57.1494	17.0483	2.28242	12.1838	650.333	130.067	5	0.271983
Median		0.659762	0.622781	2.45	2.90899		25.6051	-45.8945	1.25115	#NUM!	0.940061	0.88372	35.3155			85.5	13.8475	3.05782	57.6166	14.225	1.96356	9.63361	569	113.8	5	0.2284
Standardabw.		0.33116	0.326981	0.68374	1.09998		9.62981	37.9508	0.69461	#DIV/0!	0.130797	0.195002	10.3633			15.0715	2.96733	0.915433	6.78808	8.27283	0.863028	6.19987	363.728	72.7456	0	0.136302
Min		0.32599	0.318943	1.3	1.58967	2	9.75266	-130.951	0.428346	0	0.506443	0.256484	16.7004			57	7.99723	0.947478	44.68	7.81	1.44809	4.577	237	47.4	5	0.1516
Max		1.36656	1.36726	3.7	5.33728	3	38.211	-8.85372	2.70959	0	0.977435	0.95538	48.3287			111	17.9854	3.98359	67.45	33.374	4.07908	24.591	1636	327.2	5	0.6544
Anzahl		12	12	12	12	12	12	12	12	0	12	12	12			12	12	12	12	12	12	12	12	12	12	12

## Sheet: LIMAB MP2
Bypass	Zeitpunkt	dia PI Mean	dia PI Median	PI	Autoregulationsindex	Probe	Flowdia	A	B	p(Sign.)	R	R²	ZFP	KP	Kardioplegietyp	HF	CSP	ZFP/CSP	Paorta	LVEDP	ZFP/LVEDP	LVPdiast	Datapairs	Data per beat	Beats	Diastole
LIMABRIVA	MP 2	0.76918	0.722255	1.2	2.19087	3	51.126	-80.5436	2.10156		0.959818	0.92125	38.3256	1	Blut	88	12.62	3.0369	62.653	30.058	1.27506	17.0123	279	55.8	5	0.279
LIMAB RIVA	MP 2	0.418634	0.418341	2.5	2.94376	3	16.42	-30.0878	1.07107		0.959589	0.920811	28.0914	1	Blut	82	13.038	2.15458	43.422	11.89	2.36261	10.109	602	120.4	5	0.2408
LIMABRIVA	MP 2	0.627806	0.622561	2.9	4.60696	2	28.453	-93.8845	1.86627		0.940697	0.88491	50.306	1	Blut	106	17.399	2.89131	66.55	23.964	2.09923	15.94	446	89.2	5	0.1784
LIMABRIVA	MP 2	0.739296	0.764743	2.8	3.92965	2	30.3997	-91.2	2.09772		0.962933	0.92724	43.4758	1	Blut	103	13.191	3.29587	57.967	23.1	1.88207	12.789	458	91.6	5	0.1832
LIMABRIVA	MP 2	0.799795	0.692128	2.6	3.45008	3	19.871	-61.633	1.42919		0.917911	0.84256	43.1244	1	Blut	85	9.6955	4.44788	57.028	14.25	3.02628	6.3834	763	152.6	5	0.3052
LIMABRIVA	MP 2	0.417355	0.423893	2.6	1.84322	2	9.4426	-19.7402	0.46108		0.833343	0.69446	42.813	1	Blut	54	10.8176	3.95773	62.889	9.672	4.42648	7.685	1536	307.2	5	0.6144
LIMABRIVA	MP 2	0.40258	0.394709	2.4	2.10844	3	10.8642	-9.49637	0.28725		0.838999	0.70392	33.0596	1	Blut	101	14.1457	2.33708	70.8809	7.15	4.62372	5.2299	580	116	5	0.232
LIMABRIVA	MP 2	0.299343	0.290865	1.3	2.20395	3	63.8175	-37.6149	1.9038		0.735309	0.54068	19.7578	1	Blut	115	13.3038	1.48513	53.279	8.494	2.32609	8.25754	317	63.4	5	0.1268
LIMABRIVA	MP 2	0.728391	0.772915	2.6	2.43631	2	14.7537	-34.5217	0.864419		0.959184	0.920034	39.9363	1	Blut	101	15.4466	2.58545	57.0041	16.108	2.47928	14.6368	581	116.2	5	0.2324
LIMABRIVA	MP 2	0.324569	0.317693	2.5	3.85963	3	35.5194	-82.3592	1.85421		0.928352	0.861837	44.4173	1	Blut	96	12.7607	3.4808	63.5734	10.956	4.05416	8.69209	437	87.4	5	0.1748
LIMABRIVA	MP 2	0.879314	0.879327	3.1	2.44663	2	22.275	-36.9635	1.24126		0.966041	0.933235	29.7791	1	Blut	70	7.08299	4.20431	47.7246	7.772	3.83159	4.61397	907	181.4	5	0.3628
LIMABRIVA	MP 2	0.581777	0.581364	2.7	1.95444	2	21.0174	-27.8824	0.689737		0.971376	0.943572	40.4247	1	Blut	83	17.9506	2.252	70.8963	19.642	2.05808	16.1803	751	150.2	5	0.3004
		dia PI Mean	dia PI Median	PI	Autoregulationsindex	Probe	Flowdia	A	B	p(Sign.)	R	R²	ZFP		Kardioplegietyp	HF	CSP	ZFP/CSP	Paorta	LVEDP	ZFP/LVEDP	LVPdiast
Mittelwert		0.582337	0.5734	2.43333	2.83116		26.9966	-50.4939	1.3223	#DIV/0!	0.914463	0.841209	37.7926			90.3333	13.1209	3.01075	59.4889	15.2547	2.87039	10.6274	638.083	127.617	5	0.269183
Median		0.604792	0.601962	2.6	2.44147		21.6462	-37.2892	1.33522	#NUM!	0.94994	0.902472	40.1805			92	13.1145	2.9641	60.31	13.07	2.42095	9.40054	580.5	116.1	5	0.2366
Standardabw.		0.20255	0.198238	0.58517	0.913921		16.4132	29.7574	0.648735	#DIV/0!	0.0736122	0.12733	8.55035			16.9616	3.04523	0.903269	8.51562	7.42156	1.10077	4.49411	337.996	67.5992	0	0.127445
Min		0.299343	0.290865	1.2	1.84322	2	9.4426	-93.8845	0.28725	0	0.735309	0.54068	19.7578			54	7.08299	1.48513	43.422	7.15	1.27506	4.61397	279	55.8	5	0.1268
Max		0.879314	0.879327	3.1	4.60696	3	63.8175	-9.49637	2.10156	0	0.971376	0.943572	50.306			115	17.9506	4.44788	70.8963	30.058	4.62372	17.0123	1536	307.2	5	0.6144
Anzahl		12	12	12	12	12	12	12	12	0	12	12	12			12	12	12	12	12	12	12	12	12	12	12

## Sheet: PLA+RM_MP1
Bypass	Zeitpunkt	dia PI Mean	dia PI Median	PI	Autoregulationsindex	Probe	Flowdia	A	B	p(Sign.)	R	R²	ZFP	KP	Kardioplegietyp	HF	CSP	ZFP/CSP	Paorta	LVEDP	ZFP/LVEDP	LVPdiast	Datapairs	Data per beat	Beats	Diastole
RM	MP 1	2.68366	3.69299	3.2	4.03827	3	29.4829	-254.325	4.60285		0.979694	0.9598	55.2538	1	Blut	93	14.77	3.74095	61.7	34.31	1.61043	21.63	223	44.6	5	0.223
PLA	MP 1	0.700591	0.729631	1.6	2.33594	3	10.8354	-12.0329	0.37063		0.746137	0.55672	32.4661	1	Blut	82	13.242	2.45175	61.7	14.588	2.22553	10.331	716	143.2	5	0.2864
PLA	MP 1	9.10952	10.0116	5.4	8.75455	2	3.578	-63.1453	1.10094		0.519278	0.26965	57.3558	1	Blut	108	13.6	4.21734	60.61	30.72	1.86705	19.538	558	111.6	5	0.2232
PLA	MP 1	0.372236	0.373532	1.3	1.51473	2	27.5	-37.3709	1.00925		0.841083	0.70742	37.0284	1	Blut	57	11.642	3.18059	63.6	9.688	3.82209	8.28	1594	318.8	5	0.6376
PLA	MP 1	2.14205	2.12414	3.6	5.26167	3	63.259	-282.7	5.90281		0.896092	0.80298	47.8924	1	Blut	111	16.2242	2.95191	58.6092	13.128	3.64811	9.27704	476	95.2	5	0.1904
PLA	MP I	0.343969	0.358037	1.9	3.94448	3	38.8214	-133.465	2.71041		0.854343	0.729903	49.2417	1	Blut	83	14.2282	3.46086	63.5648	12.48	3.94565	9.82926	378	75.6	5	0.1512
PLA1-2	MP 1	0.652176	0.653602	1.8	2.59227	2	29.0636	-32.9187	0.977651		0.77212	0.596169	33.6713	1	Blut	79	15.6001	2.15841	63.3992	16.024	2.1013	14.0336	772	154.4	5	0.3088
	MP 1										0		#DIV/0!	1	Blut			#DIV/0!			#DIV/0!			0	5	0
	MP 1										0		#DIV/0!	1	Blut			#DIV/0!			#DIV/0!			0	5	0
	MP 1										0		#DIV/0!	1	Blut			#DIV/0!			#DIV/0!			0	5	0
	MP 1										0		#DIV/0!	1	Blut			#DIV/0!			#DIV/0!			0	5	0
	MP 1										0		#DIV/0!	1	Blut			#DIV/0!			#DIV/0!			0	5	0
	MP 1										0		#DIV/0!	1	Blut			#DIV/0!			#DIV/0!			0	5	0
	MP 1										0		#DIV/0!	1				#DIV/0!			#DIV/0!			0	5	0
	MP 1										0		#DIV/0!					#DIV/0!			#DIV/0!			0	5	0
		dia PI Mean	dia PI Median	PI	Autoregulationsindex	Probe	Flowdia	A	B	p(Sign.)	R	R²	ZFP		Kardioplegietyp	HF	CSP	ZFP/CSP	Paorta	LVEDP	ZFP/LVEDP	LVPdiast
Mittelwert		2.28631	2.56337	2.68571	4.06313		28.9343	-116.565	2.38208	#DIV/0!	0.373916	0.660377	#DIV/0!			87.5714	14.1866	#DIV/0!	61.8833	18.7054	#DIV/0!	13.2741	673.857	62.8933	5	0.134707
Median		0.700591	0.729631	1.9	3.94448		29.0636	-63.1453	1.10094	#NUM!	0	0.70742	#DIV/0!			83	14.2282	#DIV/0!	61.7	14.588	#DIV/0!	10.331	558	0	5	0
Standardabw.		3.14527	3.50272	1.47018	2.41873		19.3599	110.99	2.12051	#DIV/0!	0.424722	0.217781	#DIV/0!			18.51	1.53857	#DIV/0!	1.84755	9.68825	#DIV/0!	5.3398	447.483	90.9739	0	0.183301
Min		0.343969	0.358037	1.3	1.51473	2	3.578	-282.7	0.37063	0	0	0.26965	#DIV/0!			57	11.642	#DIV/0!	58.6092	9.688	#DIV/0!	8.28	223	0	5	0
Max		9.10952	10.0116	5.4	8.75455	3	63.259	-12.0329	5.90281	0	0.979694	0.9598	#DIV/0!			111	16.2242	#DIV/0!	63.6	34.31	#DIV/0!	21.63	1594	318.8	5	0.6376
Anzahl		7	7	7	7	7	7	7	7	0	15	7	7			7	7	7	7	7	7	7	7	15	15	15

## Sheet: PLA+RM MP2
Bypass	Zeitpunkt	dia PI Mean	dia PI Median	PI	Autoregulationsindex	Probe	Flowdia	A	B	p(Sign.)	R	R²	ZFP	KP	Kardioplegietyp	HF	CSP	ZFP/CSP	Paorta	LVEDP	ZFP/LVEDP	LVPdiast	Datapairs	Data per beat	Beats	Diastole
RM	MP 2	1.38229	1.49711	1.8	3.4654	3	36.87	-183.081	3.48407		0.99549	0.991	52.5481	1	Blut	88	12.831	4.0954	63.131	25.5	2.06071	16.358	218	43.6	5	0.218
PLA	MP 2	0.530905	0.50656	1.4	2.11687	3	12.22	-16.104	0.45814		0.73482	0.53996	35.1508	1	Blut	82	13.557	2.59282	61.82	14.344	2.45056	10.04	731	146.2	5	0.2924
PLA	MP 2	1.62579	1.54699	4.8	5.4322	2	10.75	-7.84281	0.29919		0.236072	0.05573	26.2135	1	Blut	103	13.423	1.95288	62.144	25.774	1.01705	14.737	584	116.8	5	0.2336
PLA	MP 2	0.339092	0.34412	1.4	1.58506	2	22.658	-32.5143	0.83682		0.848357	0.71971	38.8546	1	Blut	54	10.766	3.60901	65.4747	9.448	4.11247	7.46469	1600	320	5	0.64
PLA	MP 2	2.14777	2.06975	4.2	6.69156	3	40.9708	-199.66	4.22383		0.835943	0.6988	47.2699	1	Blut	115	12.5154	3.77694	56.9698	11.3	4.18318	7.27409	464	92.8	5	0.1856
PLA	MP 2	0.373306	0.386116	2	4.42647	3	48.2495	-218.884	4.2741		0.967804	0.936645	51.2116	1	Blut	96	13.1531	3.89351	62.5004	13.142	3.89679	10.4568	411	82.2	5	0.1644
PLA1-2	MP 2	0.683683	0.673787	1.3	3.55168	2	27.5444	-23.8774	0.511959		0.935433	0.875036	46.6393	1	Blut	83	13.9711	3.33827	72.0133	15.258	3.05671	13.2326	428	85.6	5	0.1712
	MP 2										0		#DIV/0!	1	Blut			#DIV/0!			#DIV/0!			0	5	0
	MP 2										0		#DIV/0!	1	Blut			#DIV/0!			#DIV/0!			0	5	0
	MP 2										0		#DIV/0!	1	Blut			#DIV/0!			#DIV/0!			0	5	0
	MP 2										0		#DIV/0!		Blut			#DIV/0!			#DIV/0!			0	5	0
	MP 2										0		#DIV/0!		Blut			#DIV/0!			#DIV/0!			0	5	0
	MP 2										0		#DIV/0!		Blut			#DIV/0!			#DIV/0!			0	5	0
	MP 2										0		#DIV/0!		Blut			#DIV/0!			#DIV/0!			0	5	0
	MP 2										0		#DIV/0!		Blut			#DIV/0!			#DIV/0!			0	5
		dia PI Mean	dia PI Median	PI	Autoregulationsindex	Probe	Flowdia	A	B	p(Sign.)	R	R²	ZFP		Kardioplegietyp	HF	CSP	ZFP/CSP	Paorta	LVEDP	ZFP/LVEDP	LVPdiast
Mittelwert		1.01183	1.00349	2.41429	3.89561		28.4661	-97.4233	2.01259	#DIV/0!	0.370261	0.688126	#DIV/0!			88.7143	12.8881	#DIV/0!	63.4362	16.3951	#DIV/0!	11.3662	633.714	59.1467	5	0.136086
Median		0.683683	0.673787	1.8	3.55168		27.5444	-32.5143	0.83682	#NUM!	0	0.71971	#DIV/0!			88	13.1531	#DIV/0!	62.5004	14.344	#DIV/0!	10.4568	464	0	5	0.0822
Standardabw.		0.707553	0.688903	1.45651	1.79193		14.3222	97.2984	1.87775	#DIV/0!	0.444046	0.319223	#DIV/0!			19.2848	1.05056	#DIV/0!	4.56046	6.59757	#DIV/0!	3.51939	454.457	88.4545	0	0.181596
Min		0.339092	0.34412	1.3	1.58506	2	10.75	-218.884	0.29919	0	0	0.05573	#DIV/0!			54	10.766	#DIV/0!	56.9698	9.448	#DIV/0!	7.27409	218	0	5	0
Max		2.14777	2.06975	4.8	6.69156	3	48.2495	-7.84281	4.2741	0	0.99549	0.991	#DIV/0!			115	13.9711	#DIV/0!	72.0133	25.774	#DIV/0!	16.358	1600	320	5	0.64
Anzahl		7	7	7	7	7	7	7	7	0	15	7	7			7	7	7	7	7	7	7	7	15	15	14

## Sheet:  RCA_MP1
Bypass	Zeitpunkt	dia PI Mean	dia PI Median	PI	Autoregulationsindex	Probe	Flowdia	A	B	p(Sign.)	R	R²	ZFP	KP	Kardioplegietyp	HF	CSP	ZFP/CSP	Paorta	LVEDP	ZFP/LVEDP	LVPdiast	Datapairs	Data per beat	Beats	Diastole
RCA	MP 1	0.938133	0.809992	1.2	2.93772	3	31.4227	-73.2289	1.70969		0.827267	0.68437	42.8317	1	Blut	93	15.913	2.69162	61.21	30.914	1.38551	19.324	210	42	5	0.21
RCA	MP 1	0.59955	0.618463	0.9	3.43436	2	68.022	-195.677	4.738		0.987927	0.976	41.2994	1	Blut	108	13.72	3.01016	55.7	30.034	1.37509	19.48	474	94.8	5	0.1896
RCA	MP 1	1.01977	0.905022	1.8	3.25727	3	30.5555	-22.4542	1.03614		0.45483	0.20687	21.671	1	Blut	84	8.729	2.48265	58.16	12.698	1.70665	6.957	874	174.8	5	0.3496
RCA	MP 1	1.05029	1.04914	4.2	3.75765	2	14.62	-24.4496	0.64747		0.538646	0.29014	37.7617	1	Blut	57	11.426	3.3049	59.776	9.402	4.01635	8.2846	1575	315	5	0.63
RCA	MP 1	2.40245	2.4068	3.8	4.72175	3	31.3236	-61.3434	1.6154		0.553073	0.30589	37.9741	1	Blut	111	14.7296	2.57809	57.3647	12.45	3.05013	9.09341	578	115.6	5	0.2312
RCA	MP 1	1.60041	1.60516	2.6	3.8204	2	27.2404	-77.749	2.05481		0.6772	0.458599	37.8376	1	Blut	102	17.0617	2.2177	51.0945	20.926	1.80816	19.7238	561	112.2	5	0.2244
RCA	MP 1	0.907942	0.880566	2	2.94557	2	11.7651	-23.8774	0.511959		0.935433	0.875036	46.6393	1	Blut	79	10.2036	4.57087	69.6198	11.802	3.95182	10.5188	644	128.8	5	0.2576
	MP 1										0		#DIV/0!	1	Blut			#DIV/0!			#DIV/0!			0	5	0
	MP 1										0		#DIV/0!	1	Blut			#DIV/0!			#DIV/0!			0	5	0
	MP 1										0		#DIV/0!	1	Blut			#DIV/0!			#DIV/0!			0	5	0
	MP 1										0		#DIV/0!		Blut			#DIV/0!			#DIV/0!			0	5	0
	MP 1										0		#DIV/0!		Blut			#DIV/0!			#DIV/0!			0	5	0
	MP 1										0		#DIV/0!		Blut			#DIV/0!			#DIV/0!			0	5	0
	MP 1										0		#DIV/0!		Blut			#DIV/0!			#DIV/0!			0	5	0
	MP 1										0		#DIV/0!		Blut			#DIV/0!						#DIV/0!		#DIV/0!
		dia PI Mean	dia PI Median	PI	Autoregulationsindex	Probe	Flowdia	A	B	p(Sign.)	R	R²	ZFP		Kardioplegietyp	HF	CSP	ZFP/CSP	Paorta	LVEDP	ZFP/LVEDP	LVPdiast
Mittelwert		1.21694	1.18216	2.35714	3.55353		30.707	-68.397	1.75907	#DIV/0!	0.331625	0.542415	#DIV/0!			90.5714	13.1118	#DIV/0!	58.9893	18.318	#DIV/0!	13.3402	702.286	#DIV/0!	5	#DIV/0!
Median		1.01977	0.905022	2	3.43436		30.5555	-61.3434	1.6154	#NUM!	0	0.458599	#DIV/0!			93	13.72	#DIV/0!	58.16	12.698	#DIV/0!	10.5188	578	#DIV/0!	5	#DIV/0!
Standardabw.		0.601876	0.621876	1.25414	0.622954		18.3618	61.0803	1.43167	#DIV/0!	0.391634	0.304955	#DIV/0!			18.9812	3.08068	#DIV/0!	5.70134	9.04338	#DIV/0!	5.86732	432.894	#DIV/0!	0	#DIV/0!
Min		0.59955	0.618463	0.9	2.93772	2	11.7651	-195.677	0.511959	0	0	0.20687	#DIV/0!			57	8.729	#DIV/0!	51.0945	9.402	#DIV/0!	6.957	210	#DIV/0!	5	#DIV/0!
Max		2.40245	2.4068	4.2	4.72175	3	68.022	-22.4542	4.738	0	0.987927	0.976	#DIV/0!			111	17.0617	#DIV/0!	69.6198	30.914	#DIV/0!	19.7238	1575	#DIV/0!	5	#DIV/0!
Anzahl		7	7	7	7	7	7	7	7	0	15	7	7			7	7	7	7	7	7	7	7	14	14	14

## Sheet: RCA MP2
Bypass	Zeitpunkt	dia PI Mean	dia PI Median	PI	Autoregulationsindex	Probe	Flowdia	A	B	p(Sign.)	R	R²	ZFP	KP	Kardioplegietyp	HF	CSP	ZFP/CSP	Paorta	LVEDP	ZFP/LVEDP	LVPdiast	Datapairs	Data per beat	Beats	Diastole
RCA	MP 2	0.657633	0.600319	1	1.78749	3	30.78	-31.7606	0.9531		0.889573	0.79134	33.3235	1	Blut	88	12.28	2.71364	65.622	24.55	1.35737	16.421	251	50.2	5	0.251
RCA	MP 2	0.463536	0.466678	0.9	2.51949	2	100.001	-166.003	4.37655		0.99543	0.99088	37.9301	1	Blut	103	13.586	2.79185	60.779	24.696	1.53588	14.138	474	94.8	5	0.1896
RCA	MP 2	1.1725	1.07361	2	4.48508	3	24.134	-1.60088	0.46113		0.195985	0.03841	3.47165	1	Blut	85	10.171	0.341328	55.818	14.424	0.240685	6.448	751	150.2	5	0.3004
RCA	MP 2	0.692371	0.701948	3.7	3.12372	2	16.482	-27.0808	0.6836		0.615467	0.3788	39.615	1	Blut	54	11.148	3.55355	63.0977	9.746	4.06474	7.72686	1634	326.8	5	0.6536
RCA	MP 2	1.83437	1.75355	3.8	5.13842	3	25.907	-19.7261	0.78715		0.384812	0.14808	25.0602	1	Blut	115	11.6464	2.15176	57.9725	10.696	2.34295	7.03161	540	108	5	0.216
RCA	MP2	0.612849	0.622957	1.4	2.8143	2	43.2719	-45.5216	1.52261		0.805321	0.648542	29.8971	1	Blut	101	14.9519	1.99955	58.3167	14.53	2.05761	17.6814	554	110.8	5	0.2216
RCA	MP 2	0.280004	0.273737	0.6	2.01453	2	19.684	-18.9121	0.492788		0.904163	0.817511	38.3777	1	Blut	83	15.0957	2.54228	78.3218	7.006	5.47783	10.7081	294	58.8	5	0.1176
	MP 2										0		#DIV/0!	1	Blut			#DIV/0!			#DIV/0!			0	5	0
	MP 2										0		#DIV/0!	1	Blut			#DIV/0!			#DIV/0!			0	5	0
	MP 2										0		#DIV/0!	1	Blut			#DIV/0!			#DIV/0!			0	5	0
	MP 2										0		#DIV/0!	1	Blut			#DIV/0!			#DIV/0!			0	5	0
	MP 2										0		#DIV/0!		Blut			#DIV/0!			#DIV/0!			0	5	0
	MP 2										0		#DIV/0!		Blut			#DIV/0!			#DIV/0!			0	5	0
	MP 2										0		#DIV/0!		Blut			#DIV/0!			#DIV/0!			0	5	0
	MP 2										0		#DIV/0!		Blut
		dia PI Mean	dia PI Median	PI	Autoregulationsindex	Probe	Flowdia	A	B	p(Sign.)	R	R²	ZFP		Kardioplegietyp	HF	CSP	ZFP/CSP	Paorta	LVEDP	ZFP/LVEDP	LVPdiast
Mittelwert		0.816181	0.784686	1.91429	3.12615		37.18	-44.3721	1.32528	#DIV/0!	0.319383	0.544795	#DIV/0!			89.8571	12.697	#DIV/0!	62.8468	15.0926	#DIV/0!	11.4507	642.571	64.2571	5	0.139271
Median		0.657633	0.622957	1.4	2.8143		25.907	-27.0808	0.78715	#NUM!	0	0.648542	#DIV/0!			88	12.28	#DIV/0!	60.779	14.424	#DIV/0!	10.7081	540	25.1	5	0.0588
Standardabw.		0.525569	0.491829	1.3297	1.25093		29.0297	55.2848	1.39217	#DIV/0!	0.403863	0.362003	#DIV/0!			19.5314	1.90117	#DIV/0!	7.58507	7.02069	#DIV/0!	4.64974	468.384	92.1778	0	0.186964
Min		0.280004	0.273737	0.6	1.78749	2	16.482	-166.003	0.46113	0	0	0.03841	#DIV/0!			54	10.171	#DIV/0!	55.818	7.006	#DIV/0!	6.448	251	0	5	0
Max		1.83437	1.75355	3.8	5.13842	3	100.001	-1.60088	4.37655	0	0.99543	0.99088	#DIV/0!			115	15.0957	#DIV/0!	78.3218	24.696	#DIV/0!	17.6814	1634	326.8	5	0.6536
Anzahl		7	7	7	7	7	7	7	7	0	15	7	7			7	7	7	7	7	7	7	7	14	14	14

## Sheet:  RCX MP1
Bypass	Zeitpunkt	dia PI Mean	dia PI Median	PI	Autoregulationsindex	Probe	Flowdia	A	B	p(Sign.)	R	R²	ZFP	KP	Kardioplegietyp	HF	CSP	ZFP/CSP	Paorta	LVEDP	ZFP/LVEDP	LVPdiast	Datapairs	Data per beat	Beats	Diastole
RCX	MP 1	0.812261	0.789071	2	4.51831	2	28.797	-134.869	2.70084		0.981891	0.96411	49.9359	1	Blut	103	18.283	2.73128	60.598	21.83	2.28749	16.348	454	90.8	5	0.1816
RCX	MP 1	0.555414	0.572617	1.7	5.34734	3	35.5315	-130.168	2.66871		0.634402	0.402465	48.7756	1	Blut	83	14.2883	3.41367	62.0897	12.86	3.79281	9.29372	426	85.2	5	0.1704
RCX	MP 1	0.741005	0.792047		2.14645		32.1821	-39.0985	1.16575		0.82872	0.686776	33.5394	1	Blut	83	10.2928	3.25855	61.1459	3.92	8.55598	-0.0896918	649	129.8	5	0.2596
	MP 1										0		#DIV/0!	1	Blut			#DIV/0!			#DIV/0!			0	5	0
	MP 1										0		#DIV/0!	1	Blut			#DIV/0!			#DIV/0!			0	5	0
	MP 1										0		#DIV/0!	1	Blut			#DIV/0!			#DIV/0!			0	5	0
	MP 1										0		#DIV/0!	1	Blut			#DIV/0!			#DIV/0!			0	5	0
	MP 1										0		#DIV/0!		Blut			#DIV/0!			#DIV/0!			0	5	0
	MP 1										0		#DIV/0!		Blut			#DIV/0!			#DIV/0!			0	5	0
	MP 1										0		#DIV/0!		Blut			#DIV/0!			#DIV/0!			0	5	0
	MP 1										0		#DIV/0!		Blut			#DIV/0!			#DIV/0!			0	5	0
	MP 1										0		#DIV/0!		Blut			#DIV/0!			#DIV/0!			0	5	0
	MP 1										0		#DIV/0!		Blut			#DIV/0!			#DIV/0!			0	5	0
	MP 1										0		#DIV/0!		Blut			#DIV/0!			#DIV/0!			0	5	0
	MP 1										0		#DIV/0!		Blut			#DIV/0!			#DIV/0!			0	5	0
		dia PI Mean	dia PI Median	PI	Autoregulationsindex	Probe	Flowdia	A	B	p(Sign.)	R	R²	ZFP		Kardioplegietyp	HF	CSP	ZFP/CSP	Paorta	LVEDP	ZFP/LVEDP	LVPdiast
Mittelwert		0.702893	0.717911	1.85	4.00403		32.1702	-101.378	2.17843	#DIV/0!	0.163001	0.684451	#DIV/0!			89.6667	14.288	#DIV/0!	61.2778	12.87	#DIV/0!	8.51734	509.667	20.3867	5	0.0407733
Median		0.741005	0.789071	1.85	4.51831		32.1821	-130.168	2.66871	#NUM!	0	0.686776	#DIV/0!			83	14.2883	#DIV/0!	61.1459	12.86	#DIV/0!	9.29372	454	0	5	0
Standardabw.		0.132597	0.125837	0.212132	1.66126		3.36725	53.9872	0.877158	#DIV/0!	0.343804	0.28083	#DIV/0!			11.547	3.99512	#DIV/0!	0.754542	8.955	#DIV/0!	8.2463	121.476	43.1918	0	0.0863837
Min		0.555414	0.572617	1.7	2.14645	2	28.797	-134.869	1.16575	0	0	0.402465	#DIV/0!			83	10.2928	#DIV/0!	60.598	3.92	#DIV/0!	-0.0896918	426	0	5	0
Max		0.812261	0.792047	2	5.34734	3	35.5315	-39.0985	2.70084	0	0.981891	0.96411	#DIV/0!			103	18.283	#DIV/0!	62.0897	21.83	#DIV/0!	16.348	649	129.8	5	0.2596
Anzahl		3	3	2	3	2	3	3	3	0	15	3	3			3	3	3	3	3	3	3	3	15	15	15
					b[0]	-39.0985
					b[1]	1.16575
					r ²	0.686776

## Sheet: RCX MP2
Bypass	Zeitpunkt	dia PI Mean	dia PI Median	PI	Autoregulationsindex	Probe	Flowdia	A	B	p(Sign.)	R	R²	ZFP	KP	Kardioplegietyp	HF	CSP	ZFP/CSP	Paorta	LVEDP	ZFP/LVEDP	LVPdiast	Datapairs	Data per beat	Beats	Diastole
RCX	MP 2	1.06051	1.01098	3	5.90847	2	22.559	-121.669	2.13522		0.963286	0.92792	56.982	1	Blut	106	16.73	3.40597	67.547	22.944	2.48352	14.687	497	99.4	5	0.1988
RCX	MP 2	1.20477	1.3111	2.9	9.17165	3	18.6508	-214.852	3.82921		0.757426	0.573694	56.1088	1	Blut	96	12.6668	4.42961	60.9795	10.826	5.18278	8.862	470	94	5	0.188
RCX	MP 2	0.923537	0.86062		2.44764		20.1714	-16.4644	0.782829		0.675009	0.455638	21.0319	1	Blut	70	6.8421	3.0739	46.7992	8.05	2.61266	4.49639	951	190.2	5	0.3804
	MP 2										0		#DIV/0!	1	Blut			#DIV/0!			#DIV/0!			0	5	0
	MP 2										0		#DIV/0!	1	Blut			#DIV/0!			#DIV/0!			0	5	0
	MP 2										0		#DIV/0!	1	Blut			#DIV/0!			#DIV/0!			0	5	0
	MP 2										0		#DIV/0!	1	Blut			#DIV/0!			#DIV/0!			0	5	0
	MP 2										0		#DIV/0!		Blut			#DIV/0!			#DIV/0!			0	5	0
	MP 2										0		#DIV/0!		Blut			#DIV/0!			#DIV/0!			0	5	0
	MP 2										0		#DIV/0!		Blut			#DIV/0!			#DIV/0!			0	5	0
	MP 2										0		#DIV/0!		Blut			#DIV/0!			#DIV/0!			0	5	0
	MP 2										0		#DIV/0!		Blut			#DIV/0!			#DIV/0!			0	5	0
	MP 2										0		#DIV/0!		Blut			#DIV/0!			#DIV/0!			0	5	0
	MP 2										0		#DIV/0!		Blut			#DIV/0!			#DIV/0!			0	5	0
	MP 2										0		#DIV/0!		Blut			#DIV/0!			#DIV/0!			0	5	0
		dia PI Mean	dia PI Median	PI	Autoregulationsindex	Probe	Flowdia	A	B	p(Sign.)	R	R²	ZFP		Kardioplegietyp	HF	CSP	ZFP/CSP	Paorta	LVEDP	ZFP/LVEDP	LVPdiast
Mittelwert		1.06294	1.0609	2.95	5.84258		20.4604	-117.662	2.24909	#DIV/0!	0.159715	0.652417	#DIV/0!			90.6667	12.0796	#DIV/0!	58.4419	13.94	#DIV/0!	9.34847	639.333	25.5733	5	0.0511467
Median		1.06051	1.01098	2.95	5.90847		20.1714	-121.669	2.13522	#NUM!	0	0.573694	#DIV/0!			96	12.6668	#DIV/0!	60.9795	10.826	#DIV/0!	8.862	497	0	5	0
Standardabw.		0.140635	0.22935	0.0707107	3.36249		1.97008	99.2546	1.52638	#DIV/0!	0.33537	0.245786	#DIV/0!			18.5831	4.97003	#DIV/0!	10.6041	7.92026	#DIV/0!	5.11269	270.249	56.7466	0	0.113493
Min		0.923537	0.86062	2.9	2.44764	2	18.6508	-214.852	0.782829	0	0	0.455638	#DIV/0!			70	6.8421	#DIV/0!	46.7992	8.05	#DIV/0!	4.49639	470	0	5	0
Max		1.20477	1.3111	3	9.17165	3	22.559	-16.4644	3.82921	0	0.963286	0.92792	#DIV/0!			106	16.73	#DIV/0!	67.547	22.944	#DIV/0!	14.687	951	190.2	5	0.3804
Anzahl		3	3	2	3	2	3	3	3	0	15	3	3			3	3	3	3	3	3	3	3	15	15	15

## Sheet: RD_MP1
Bypass	Zeitpunkt	dia PI Mean	dia PI Median	PI	Autoregulationsindex	Probe	Flowdia	A	B	p(Sign.)	R	R²	ZFP	KP	Kardioplegietyp	HF	CSP	ZFP/CSP	Paorta	LVEDP	ZFP/LVEDP	LVPdiast	Datapairs	Data per beat	Beats	Diastole
RD	MP 1	2.29148	2.44268	2.9	7.27684	3	10.9413	-181.545	3.33415		0.982492	0.96529	54.4502	1	Blut	93	15.4159	3.53208	53.7218	33.764	1.61267	24.5958	153	30.6	5	0.153
RD	MP 1	0.768785	0.701943	2.1	2.88365	3	18.563	-34.9095	0.9318		0.875854	0.76712	37.4646	1	Blut	82	14.574	2.57065	57.386	15.292	2.44995	10.846	746	149.2	5	0.2984
RD	MP 1	0.666612	0.692289	2	2.29753	2	10.44	-21.3051	0.50223		0.88833	0.78913	42.421	1	Blut	57	11.39	3.72441	62.74	62.738	0.676161	8.186	1624	324.8	5	0.6496
RD	MP 1	1.03936	1.006	1.3	5.11925	3	16.222	-72.9289	1.43171		0.694716	0.48263	50.9383	1	Blut	87	14.511	3.51032	62.269	10.66	4.77845	5.435	409	81.8	5	0.1636
RD	MP 1	0.288627	0.284175	1.9	2.59987	3	80.1099	-174.805	4.02953		0.959315	0.920286	43.381	1	Blut	83	14.0231	3.09355	63.2617	13.512	3.21055	8.80744	501	100.2	5	0.2004
RD	MP 1	0.673065	0.674569	3	2.33262	2	15.4865	-19.0239	0.541783		0.921787	0.849692	35.1134	1	Blut	79	14.9745	2.34488	63.6978	14.65	2.39682	13.068	820	164	5	0.328
	MP 1										0		#DIV/0!	1	Blut			#DIV/0!			#DIV/0!			0	5	0
	MP 1										0		#DIV/0!	1	Blut			#DIV/0!			#DIV/0!			0	5	0
	MP 1										0		#DIV/0!	1	Blut			#DIV/0!			#DIV/0!			0	5	0
	MP 1										0		#DIV/0!	1	Blut			#DIV/0!			#DIV/0!			0	5	0
	MP 1										0		#DIV/0!	1	Blut			#DIV/0!			#DIV/0!			0	5	0
	MP 1										0		#DIV/0!	1	Blut			#DIV/0!			#DIV/0!			0	5	0
	MP 1										0				Blut
	MP 1														Blut
	MP 1														Blut
		dia PI Mean	dia PI Median	PI	Autoregulationsindex	Probe	Flowdia	A	B	p(Sign.)	R	R²	ZFP		Kardioplegietyp	HF	CSP	ZFP/CSP	Paorta	LVEDP	ZFP/LVEDP	LVPdiast
Mittelwert		0.954654	0.966943	2.2	3.75163		25.2938	-84.0863	1.7952	#DIV/0!	0.409423	0.795691	#DIV/0!			80.1667	14.1481	#DIV/0!	60.5127	25.1027	#DIV/0!	11.823	708.833	70.8833	5	0.149417
Median		0.720925	0.697116	2.05	2.74176		15.8543	-53.9192	1.18175	#NUM!	0	0.819411	#DIV/0!			82.5	14.5425	#DIV/0!	62.5045	14.971	#DIV/0!	9.82672	623.5	15.3	5	0.0765
Standardabw.		0.697807	0.758504	0.644981	2.02511		27.0378	75.4262	1.51532	#DIV/0!	0.465027	0.170921	#DIV/0!			12.3356	1.43011	#DIV/0!	4.04079	20.1984	#DIV/0!	6.76427	508.589	100.917	0	0.200235
Min		0.288627	0.284175	1.3	2.29753	2	10.44	-181.545	0.50223	0	0	0.48263	#DIV/0!			57	11.39	#DIV/0!	53.7218	10.66	#DIV/0!	5.435	153	0	5	0
Max		2.29148	2.44268	3	7.27684	3	80.1099	-19.0239	4.02953	0	0.982492	0.96529	#DIV/0!			93	15.4159	#DIV/0!	63.6978	62.738	#DIV/0!	24.5958	1624	324.8	5	0.6496
Anzahl		6	6	6	6	6	6	6	6	0	13	6	6			6	6	6	6	6	6	6	6	12	12	12

## Sheet: RDP_MP1
Bypass	Zeitpunkt	dia PI Mean	dia PI Median	PI	Autoregulationsindex	Probe	Flowdia	A	B	p(Sign.)	R	R²	ZFP	KP	Kardioplegietyp	HF	CSP	ZFP/CSP	Paorta	LVEDP	ZFP/LVEDP	LVPdiast	Datapairs	Data per beat	Beats	Diastole
RDP	MP 1	0.272127	0.265694	0.7	1.54593	2	54.387	-30.6341	1.41229		0.963001	0.92737	21.6911	1	Blut	103	14.917	1.45412	60.201	22.008	0.9856	14.364	521	104.2	5	0.2084
	MP 1														Blut
	MP 1														Blut
	MP 1														Blut
	MP 1														Blut
	MP 1														Blut
	MP 1														Blut
	MP 1														Blut
	MP 1														Blut
	MP 1														Blut
	MP 1														Blut
	MP 1														Blut
	MP 1														Blut
	MP 1														Blut
	MP 1														Blut
		dia PI Mean	dia PI Median	PI	Autoregulationsindex	Probe	Flowdia	A	B	p(Sign.)	R	R²	ZFP		Kardioplegietyp	HF	CSP	ZFP/CSP	Paorta	LVEDP	ZFP/LVEDP	LVPdiast
Mittelwert		0.272127	0.265694	0.7	1.54593		54.387	-30.6341	1.41229	#DIV/0!	0.963001	0.92737	21.6911			103	14.917	1.45412	60.201	22.008	0.9856	14.364	521	104.2	5	0.2084
Median		0.272127	0.265694	0.7	1.54593		54.387	-30.6341	1.41229	#NUM!	0.963001	0.92737	21.6911			103	14.917	1.45412	60.201	22.008	0.9856	14.364	521	104.2	5	0.2084
Standardabw.		#DIV/0!	#DIV/0!	#DIV/0!	#DIV/0!		#DIV/0!	#DIV/0!	#DIV/0!	#DIV/0!	#DIV/0!	#DIV/0!	#DIV/0!			#DIV/0!	#DIV/0!	#DIV/0!	#DIV/0!	#DIV/0!	#DIV/0!	#DIV/0!	#DIV/0!	#DIV/0!	#DIV/0!	#DIV/0!
Min		0.272127	0.265694	0.7	1.54593	2	54.387	-30.6341	1.41229	0	0.963001	0.92737	21.6911			103	14.917	1.45412	60.201	22.008	0.9856	14.364	521	104.2	5	0.2084
Max		0.272127	0.265694	0.7	1.54593	2	54.387	-30.6341	1.41229	0	0.963001	0.92737	21.6911			103	14.917	1.45412	60.201	22.008	0.9856	14.364	521	104.2	5	0.2084
Anzahl		1	1	1	1	1	1	1	1	0	1	1	1			1	1	1	1	1	1	1	1	1	1	1

[truncated: 5 more sheets: RD MP2,  RDP_MP2,  RIM_MP1, RIM_MP2, Tabelle1]
