# Supplementary material for: Influence of isoflurane on the diastolic pressure-flow relationship and critical occlusion pressure during arterial CABG surgery: a randomized controlled trial
Source: PeerJ. 2016 Jan 26;4:e1619. doi: 10.7717/peerj.1619 (PMC4783760; doi:10.7717/peerj.1619)
Supplement: Supplemental Information 5 — All variables are presented clearly. [file peerj-04-1619-s005.xlsx]

## Sheet: Rohdaten
MDAP Control T15	MDAP Control T30	MDAP Isofluran T15	MDAP Isofluran T30	CSP Control T15	CSP Control T30	CSP Isofluran T15	CSP Isofluran T30	COP Control T15	COP Control T30	COP Isofluran T15	COP Isofluran T30	LVEDP Control T15	LVEDP Control T30	LVEDP Isofluran T15	LVEDP Isofluran T30	CPPMDAP-CSP Control T15	CPPMDAP-CSP Control T30	CPPMDAP-CSP Isoflurane T15	CPPMDAP-CSP Isoflurane T30	CPPMDAP-LVEDP Control T15	CPPMDAP-LVEDP Control T30	CPPMDAP-LVEDP Isoflurane T15	CPPMDAP-LVEDP Isoflurane T30	CPPMDAP-COP Control T15	CPPMDAP-COP Control T30	CPPMDAP-COP Isoflurane T15	CPPMDAP-COP Isoflurane T30
60.7448	62.653	53.3375	48.4135	15.86	12.62	6.92815	5.45052	48.3287	38.3256	34.6776	35.6847	33.374	30.058	17.344	16.984	44.8848	48.1248	46.4093	47.8869	27.3708	32.595	35.9935	31.4295	12.4161	24.3274	18.6599	12.7288
44.68	43.422	70.587	51.0711	13.885	13.038	20.1372	18.9923	23.4131	28.1187	25.614	41.577	12.718	11.89	10.244	10.162	30.795	31.642	50.4498	51.5947	31.962	31.532	60.343	40.9091	21.2669	15.3033	44.9729	9.49411
60.76	66.55	56.6615	51.1366	14.5553	17.399	7.82013		44.6621	43.9023	33.8823	35.9322	22.596	23.964	8.068	16.106	46.2047	43.361	48.8414	56.6615	38.164	42.586	48.5935	35.0306	16.0979	22.6477	22.7792	15.2043
54.025	57.967	64.8352	52.8164	14.266	13.191	12.8959	11.0943	45.3291	43.4758	52.635	41.521	29.82	23.1	12.244	12.67	39.759	40.834	51.9393	53.7409	24.205	34.867	52.5912	40.1464	8.69594	14.4912	12.2002	11.2954
51.958	57.028	61.3604	46.0359	9.484	9.6955	8.45124	8.75032	35.388	43.1244	34.7521	30.9418	14.368	14.25	8.198	12.2	42.474	42.2625	52.9091	52.61	37.59	42.778	53.1624	33.8359	16.57	13.9036	26.6083	15.0941
61.86	62.889	55.5562	49.5821	11.363	10.8176	5.18424	7.50819	35.2429	42.813	34.7257	32.6434	9.676	9.672	8.7304	9.29	50.497	51.0425	50.3719	48.048	52.184	53.217	46.8258	40.2921	26.6171	20.076	20.8305	16.9386
50.5	57.0041	79.4996	56.65	18	15.4466	10.3966	12.31	42.1556	39.9363	35.7561	31.4417	21.6	16.108	15.87	17.72	32.5	35.0534	69.1029	67.1896	28.9	40.8961	63.6296	38.93	8.34436	17.0678	43.7435	25.2083
62.7748	63.5734	63.5045	44.8007	13.674	12.7607	9.9637	9.93605	42.4835	44.4173	40.3242	27.0744	14.082	10.956	10.246	8.598	49.1008	50.0141	53.5408	53.5684	48.6928	52.6174	53.2585	36.2027	20.2913	19.1561	23.1803	17.7262
52.1829	47.7246	71.951	54.8664	7.99723	7.08299	14.054	10.0826	31.8576	29.7791	58.7244	30.8971	7.81	7.772	36.648	13.08	44.1857	45.0999	57.897	61.8684	44.3729	39.9526	35.303	41.7864	20.3253	17.9455	13.2266	23.9694
64.393	70.8963	58.4016	46.4174	12.379	17.9506	13.9473	11.8989	31.4906	40.4247	49.0033	41.9122	18.202	19.642	24.8632	22.1284	52.014	46.4424	44.4543	46.5026	46.191	51.2543	33.5384	24.289	32.9024	30.4715	9.39823	4.50522

## Sheet: CPP Vergleich
	Gült. N	Median	Minimum	Maximum
CPPMDAP-CSP Control T15	10	44.5352	30.795	52.014
CPPMDAP-CSP Control T30	10	44.2305	31.642	51.0425
CPPMDAP-CSP Isoflurane T15	10	51.1946	44.4543	69.1029
CPPMDAP-CSP Isoflurane T30	10	53.0892	46.5026	67.1896
CPPMDAP-LVEDP Control T15	10	37.877	24.205	52.184
CPPMDAP-LVEDP Control T30	10	41.741	31.532	53.217
CPPMDAP-LVEDP Isoflurane T15	10	50.5924	33.5384	63.6296
CPPMDAP-LVEDP Isoflurane T30	10	37.5663	24.289	41.7864
CPPMDAP-COP Control T15	10	18.4306	8.34436	32.9024
CPPMDAP-COP Control T30	10	18.5508	13.9036	30.4715
CPPMDAP-COP Isoflurane T15	10	21.8048	9.39823	44.9729
CPPMDAP-COP Isoflurane T30	10	15.1492	4.50522	25.2083
